# Supplementary material
Source: publisher figshare collection journal article supplement (https://gsapubs.figshare.com/articles/dataset/_/12221786)
Supplement: Supplementary file 1 [file 1]

## Sheet: Concentrations1
Sample Data
Source file	Spot size (µm)	Na_ppm_m23	Cl_ppm_m35 (corrected)	Mn_ppm_m55	Fe_ppm_m57	Co_ppm_m59	Ni_ppm_m60	Cu_ppm_m63	Ga_ppm_m69	Ge_ppm (best value)	As_ppm_m75	Se_ppm_m77	Br_ppm_m79	Br_ppm_m81	Ag_ppm_m107	Cd_ppm_m111	In_ppm (best value)	Sn_ppm_m118	Sb_ppm_m121	Hg_ppm_m202	Tl_ppm_m205	Pb_ppm_m208	PC1	T (GGIMFis)
Li-HS-86_sph_I_244.d	30	-6.4536	-364.305	85.5	5260	0.929	-2	53.3	0.73	18.038	4.6	-20	-12.8005	-11.0028	0.76	1071	-0.1	-0.6	0.53	48.1	-0.2	2.51	0.168398	198.839
Li-HS-86_sph_I_245.d	30	-5.7115	-437.193	92.4	5710	1.22	-2	87	-0.4	15.776	43.1	-20	-14.558	-11.9822	8.3	1007	-0.1	-0.6	4.52	66.5	-0.2	26.5	-0.0393218	210.139
Li-HS-86_sph_I_246.d	30	-5.9404	-419.592	95.2	5990	1.172	-2	468	3.18	108.866	167.6	-20	-13.1666	-10.1672	30.1	1051	-0.12891	-0.6	20.9	74.3	0.43	81	0.790117	165.018
Li-HS-86_sph_I_247.d	30	-5.0415	-362.425	96.4	6360	0.975	-2	362.8	5.31	119.364	28.1	-20	-13.5311	-12.0826	5.42	1028	-0.1	-0.6	6.74	86.2	0.422	23.2	0.926418	157.603
Li-HS-86_sph_I_248.d	30	-5.6414	-379.925	70	5980	1.186	-2	410	1.16	67.338	191	-20	-15.956	-9.32942	33.1	900	-0.1	-0.6	16.3	138.5	1.363	88.6	0.552618	177.938
Li-HS-86_sph_I_249.d	30	-6.3015	-397.958	89	6730	0.74	-2	258.7	2.09	28.1068	106.7	-20	-12.8366	12.4194	15.17	895	-0.1	-0.6	11.06	203.1	0.328	42.1	0.398179	186.339
Li-HS-86_sph_I_250.d	30	-6.6199	-464.845	1.88	4130	2.51	-2	133.9	2.12	39.092	9	-20	-19.7478	-12.5954	5.5	660	-0.1	-0.6	0.88	440	4.28	129	1.42604	130.424
Li-HS-86_sph_I_251.d	30	-4.9869	1303.69	1.58	4465	1.76	-2	3681	-0.4	150.394	3582	-20	-12.5968	10.6452	460.1	895	-0.1	-0.6	18.8	-0.86715	16.21	1844	1.36147	133.936
Li-HS-86_sph_I_252.d	30	15.3	-362.141	3.48	5589	2.65	-2	60.3	-0.4	14.8132	42	-20	-12.1749	-11.9478	16.32	654.3	-0.1	-0.6	-0.4	-0.81185	2.13	1119	0.610568	174.785
Li-HS-86_sph_I_253.d	30	29	-300.155	1.49	5020	1.631	-2	393	-0.4	79.808	76.5	-20	-15.2134	-11.0809	11.45	635	-0.1	-0.6	0.71	-0.99323	22.9	66.9	1.19045	143.24
Li-HS-86_sph_I_254.d	50	6	239.453	1.93	5337	2.483	-0.4	524.7	-0.06	210.598	29.6	-2	4.54194	-2.98185	6.89	556.6	-0.02	-0.08	0.099	-0.23638	4.41	46.7	1.08919	148.748
Li-HS-86_sph_I_255.d	50	-1.2129	-85.6767	1.788	4297	2.65	-0.4	47.7	-0.06	8.12	22.9	-2	-3.05112	-2.02755	11.21	747.9	-0.02	-0.08	-0.08	-0.20872	0.774	997	0.468432	182.517
Li-HS-86_sph_I_256.d	30	-7.3086	-640.077	1.09	3530	1.69	-2	108.2	1.41	16.472	111	-20	-18.0074	-14.5686	12.58	670	-0.1	-0.6	1.36	-1.2443	1.65	100.6	1.31328	136.558
Li-HS-86_sph_I_257.d	30	-7.3614	-684.125	1.05	2640	2.33	-2	73.2	-0.4	6.554	86.2	-20	-22.7292	-15.224	12.51	825	-0.1	-0.6	1.2	-1.4763	2.91	27
Li-HS-86_sph_I_258.d	50	-1.0491	109.38	1.183	2816	1.909	-0.4	293	-0.06	22.4692	335	-2	-3.18056	-2.29055	46.3	809.6	-0.02	-0.23296	1.89	-0.18003	2.46	738	0.931322	157.336
Li-HS-86_sph_I_259.d	50	2.24	-72.6339	0.931	2882	2.308	-0.4	20.1	1.29	3.3118	7.21	-2	-2.3848	-2.36631	1.475	839.7	-0.02	-0.08	0.83	-0.1719	0.151	2.98	1.22441	141.392
Li-HS-86_sph_I_260.d	30	23.6	-369.939	6.06	3747	1.035	-2	686	0.526	80.214	657	-20	-14.179	-10.863	64.4	496.5	-0.1	-0.6	6.71	-0.84206	8.2	458
Li-HS-86_sph_I_261.d	30	5	543.942	4.17	3257	0.375	-2	412	-0.4	119.828	289	-20	-13.5367	-13.6141	80	589.3	-0.1	-0.6	-0.4	-0.91673	13.48	4436	1.23411	140.865
Li-HS-86_sph_I_262.d	30	-5.3932	-377.596	0.75	2567	1.349	-2	119.7	3.88	27.84	10.2	-20	-13.2621	-12.7139	2.12	620	-0.1	-0.6	1.47	-1.0244	0.104	9.27	1.84407	107.682
Li-HS-86_sph_I_263.d	30	16.8	-416.163	4.13	2739	0.725	-2	434.2	-0.4	116.116	253.9	-20	-15.9567	-13.1265	54.4	680	-0.1	-0.6	-0.4	-0.83158	18.87	2512	1.2932	137.65
Li-HS-86_sph_I_264.d	30	5.4	-411.137	-0.69197	2647	1.71	-2	93.3	7.16	25.114	36.1	-20	-12.5098	-10.147	3.95	721	-0.1	-0.6	1.79	-4100	0.238	10.52	1.96094	101.325
Li-HS-86_sph_I_265.d	30	-7.1981	-424.475	3.65	5680	1.27	-2	66.6	-0.4	16.066	42.4	-20	-16.2466	-12.6287	9.3	869	-0.1	-0.6	1.71	369	-0.2	71.3	0.612915	174.657
Li-HS-86_sph_I_266.d	30	-5.5138	1463.32	14.96	6720	1.183	-2	1395	-0.4	82.766	923	-20	13.8387	-10.1207	122.2	795	-0.1	-0.6	15	176.2	14.6	807	0.629222	173.77
Li-HS-86_sph_I_267.d	30	44.1	1451.5	40.7	7140	-0.3	-2	1298	-0.4	217.674	855	-20	-12.3235	12.7742	167.5	1199	-0.1	-0.6	2.05	112.2	35.57	3563	0.619357	174.307
Li-HS-86_sph_II_276.d	20	-253.35	1611.13	9.8	9000	-0.3	-2	5030	-0.4	133.748	1230	-20	-63.36	-48.3965	264	1076	-0.1	-0.63478	6.1	16.9	159.5	5180
Li-HS-86_sph_II_277.d	20	39	-698.374	9.3	9920	-0.3	-2	7020	-0.4	119.77	1481	-20	-27.5142	-29.9285	208	1076	-0.1	-0.6	5.09	18.33	121.8	2330	0.661496	172.015
Li-HS-86_sph_II_278.d	20	55.1	-982.347	10.71	9220	-0.3	-2	5780	-0.4	87.522	1472	-20	-24.5084	-22.8545	151.9	1073	-0.1	-0.6	4.74	21.5	60.5	3190
Li-HS-86_sph_II_279.d	20	49	-601.706	11.4	8780	-0.3	-2	4900	-0.4	85.608	1353	-20	-29.0553	-30.8461	158.3	1094	-0.1	-0.6	5.83	17.07	112.5	2284	0.592069	175.791
Li-HS-86_sph_II_280.d	20	97	-556.488	11.33	7480	-0.3	-2	3910	-0.4	108.75	1346	-20	29.0968	-21.6984	146.1	976	-0.1	-0.6	4.78	20	76.1	1817	0.705231	169.635
Li-HS-86_sph_II_281.d	20	162	742.007	11.8	6630	-0.3	-2	1900	-0.4	136.764	650	-20	30.5161	-23.0695	66.8	1027	-0.1	-0.6	2.37	22.9	39.3	1510	0.79216	164.907
Li-HS-86_sph_II_282.d	20	354	4951.64	127.4	6620	-0.3	-2	1017	-0.4	206.944	205.5	-20	27.6774	29.0968	76.7	1008	-0.1	-0.6	3.03	22.96	184.1	3850	0.407994	185.805
Li-HS-86_sph_II_283.d	20	31.7	3296.17	14	5960	0.5	-2	1161	-0.4	152.656	410	-20	-36.1758	-35.5655	124.7	925	-0.1	-0.6	-0.56015	18.3	95.2	6550	0.82157	163.307
Li-HS-86_sph_II_284.d	20	415	8173.91	37.9	6640	-0.3	-2	781	-0.4	208.916	130.9	-20	24.4839	28.0323	85.1	937	-0.1	-0.6	0.69	21.8	1052	6930	0.65144	172.562
Li-HS-86_sph_II_285.d	20	563	8469.53	54.4	6950	0.49	-2	2640	-0.4	462.376	656	-20	32.6452	25.9032	157.4	913	-0.1	-0.6	0.93	21.8	715	5080	0.737053	167.904
Li-HS-86_sph_II_286.d	20	532	7523.54	54.3	7120	1.17	4.3	3300	-0.4	440.916	1000	-20	21.6452	23.0645	158.2	928	-0.1	-0.6	1.42	21.8	604	4790	0.718024	168.939
Li-HS-86_sph_II_287.d	20	391	4626.46	100.9	5900	0.88	2.81	1240	0.59	127.832	715	-20	48.2581	-25.7187	166.6	872	-0.1	-0.6	1.71	25.3	242.2	8780	0.476761	182.064
Li-HS-86_sph_II_288.d	20	317	4951.64	165.6	6290	0.48	-2	634	-0.4	74.124	211.9	-20	-28.7984	-26.6463	84.2	877	-0.1	-0.6	2.43	18.1	382	5560	0.148589	199.917
Li-HS-86_sph_II_289.d	20	342	4892.52	117.1	6330	1.48	4.68	1440	-0.4	120.872	926	-20	26.6129	28.3871	151	829	-0.1	-0.6	1.27	24.41	383	5850	0.323131	190.422
Li-HS-86_sph_II_290.d	20	942	4094.34	34.8	5880	0.544	-2	4470	-0.4	248.936	1410	-20	-21.989	20.2258	237.7	844	-0.1	-0.6	12.7	24.4	29.14	841	0.75204	167.089
Li-HS-86_sph_II_291.d	20	1062	4892.52	39.8	6150	0.433	-2	4580	-0.4	233.508	1770	-20	34.7742	-20.3603	244.4	868	-0.1	-0.6	11.4	25.8	31.72	784	0.694504	170.219
Li-HS-86_sph_II_292.d	20	666	3148.36	10.8	6070	0.45	-2	9100	-0.4	247.834	3820	-20	35.8387	37.2581	290	898	-0.1	-0.6	17.7	19.7	26.25	875	0.973312	155.052
Li-HS-86_sph_II_293.d	20	722	2970.99	9.9	6370	0.42	-2	6640	-0.4	244.876	2630	-20	45.7742	-25.9199	272.9	937	-0.1	-0.6	13.7	20.5	29.17	992	0.970224	155.22
Li-HS-86_sph_II_294.d	20	1110	4097.3	11.45	5910	0.379	-2	3310	-0.4	202.42	1440	-20	26.6129	-20.664	219.7	883	-0.1	-0.6	11	28.6	18.56	715	0.926976	157.573
Li-HS-86_sph_II_295.d	20	991	4094.34	10.02	5870	-0.3	-2	3640	-0.4	189.66	1510	-20	-25.7996	-22.6029	201.5	854	-0.1	-0.6	11	28.8	17.39	640	0.941845	156.764
Li-HS-86_sph_II_296.d	20	703	3562.23	34.7	6840	0.76	-2	16000	-0.4	313.548	7020	-20	-23.018	-16.8257	396.2	965	-0.1	-0.6	15.35	19.2	85.4	13000	0.747427	167.34
Li-HS-86_sph_II_297.d	20	406	4596.9	125.4	6300	-0.3	-2	5890	-0.4	188.906	2860	-20	-26.5877	-23.2125	284	937	-0.1	-0.6	4.09	20.7	411	45000	0.409427	185.727
Li-HS-86_sph_II_298.d	20	268	3769.16	117.8	6180	0.349	-2	6290	-0.4	195.286	3620	-20	31.2258	-20.6073	360	873	-0.1	-0.6	3.79	25.9	438	3640	0.436354	184.262
Li-HS-86_sph_II_299.d	20	301	5424.64	308	6200	0.5	-2	1100	-0.4	107.706	667	-20	-31.9518	-34.0649	98.2	844	-0.1	-0.6	1.27	29.2	493	3740	0.112023	201.906
Li-HS-86_sph_II_300.d	20	450	5661.13	184.2	6200	0.48	-2	594	-0.4	63.916	224	-20	-28.1192	-24.8905	63.3	780	-0.1	-0.6	0.92	31.5	283	4590	0.100035	202.558
Li-HS-86_sph_II_301.d	20	425	4330.84	104.1	6090	0.549	-2	930	-0.4	70.354	542	-20	-21.8336	-22.6735	95	819	-0.1	-0.6	1.89	37.8	195	4160	0.241905	194.84
Li-HS-86_sph_II_302.d	20	552	5276.82	81.4	6110	0.8	-2	735	-0.4	107.764	214	-20	23.7742	-21.9113	76.6	793	-0.1	-0.6	0.75	40.6	207.9	3612	0.383697	187.127
Li-HS-86_sph_II_303.d	20	333	4685.58	53.7	5840	0.518	-2	649	-0.4	73.776	337	-20	33.7097	-18.8483	80.5	824	-0.1	-0.6	1.29	42.3	220.8	3576	0.400251	186.226
Li-HS-86_sph_II_312.d	20	430	7650.66	74.3	6260	0.44	-2	1885	-0.4	182.352	979	-20	43.6452	-25.2312	114	824	-0.1	-0.6	1.56	46.4	1032	5580	0.508695	180.327
Li-HS-86_sph_II_313.d	20	427	9631.31	65.9	6560	0.35	-2	3460	-0.4	226.258	1860	-20	-22.1505	29.8065	167.5	839	-0.1	-0.6	2.52	48.9	1630	7830	0.562831	177.382
Li-HS-86_sph_II_314.d	20	225	6349.93	43.2	5780	0.41	-2	751	-0.4	116.754	355	-20	-29.4105	-23.5847	92.3	789	-0.1	-0.6	0.89	47.3	744	6120	0.548575	178.158
Li-HS-86_sph_II_315.d	20	284	6615.99	60.8	6300	0.3	-2	697	-0.4	132.182	251	-20	-32.8187	-29.3572	65.8	752	-0.1	-0.6	0.65	52	384	5610	0.475655	182.124
Li-HS-86_sph_II_316.d	20	222	5965.62	44.6	5830	-0.3	-2	858	-0.4	100.514	394	-20	-25.4707	-19.7024	83.5	806	-0.1	-0.6	1.69	58.8	640	6340	0.506059	180.47
Li-HS-86_sph_II_317.d	20	219	4221.46	22.5	5830	-0.3	-2	7960	-0.4	250.096	4810	-20	28.7419	23.4194	434.6	829	-0.1	-0.6	3.02	47.9	866	4790	0.843443	162.117
Li-HS-86_sph_II_318.d	20	344	5197.01	41.1	5380	-0.3	-2	6230	-0.4	238.032	3970	-20	51.0968	24.8387	373	814	-0.1	-0.6	10.8	45.3	586	5360	0.74179	167.647
Li-HS-86_sph_II_319.d	20	183	4428.39	25.8	5250	-0.3	-2	3650	0.43	160.022	1769	-20	-27.6497	-20.6073	234.1	783	-0.1	-0.6	17.6	63.2	770	4490	0.772517	165.975
Li-HS-86_sph_II_320.d	20	221	5551.75	30.9	5820	-0.3	5.9	4450	-0.4	207.118	1919	-20	-27.7668	30.5161	275	757	-0.1	-0.6	5.24	60	898	5380	0.739148	167.79
Li-HS-86_sph_II_321.d	20	356	8123.65	16.4	5290	-0.3	-2	2440	-0.4	250.328	1220	-20	-22.3392	23.7742	133.7	808	-0.1	-0.6	0.94	57.7	1121	7240	0.942858	156.709
Li-HS-86_sph_II_322.d	20	437	8744.45	17.2	5250	-0.3	-2	2260	-0.4	253.692	1000	-20	-22.1285	27.3226	148	795	-0.1	-0.6	2.78	61.5	1352	7380	0.939077	156.914
Li-HS-86_sph_II_323.d	20	585	7059.42	14.26	4790	-0.3	-2	1710	-0.4	289.942	698	-20	51.8065	24.129	152.3	759	-0.1	-0.6	2.08	66	587	4950	1.03988	151.431
Li-HS-86_sph_II_324.d	20	355	5847.37	10.66	4720	-0.3	-2	2010	-0.4	185.31	903	-20	41.5161	26.2581	106.2	745	-0.1	-0.6	1.18	64.3	460	4910	1.00503	153.326
Li-HS-86_sph_II_325.d	20	257	6349.93	10.6	4170	-0.3	-2	721	-0.4	131.718	245	-20	-32.7051	23.4194	79.3	721	-0.1	-0.6	0.4	71.2	591	6650	0.976903	154.856
Li-HS-86_sph_II_326.d	20	181.8	5551.75	7.29	3470	-0.3	-2	712	-0.4	110.838	295	-20	-25.9788	-18.8806	77.3	692	-0.1	-0.6	0.44	66	265	5590	1.08179	149.15
Li-HS-86_sph_II_327.d	20	225	6586.42	9.79	3490	-0.3	-2	836	-0.4	174.174	367	-20	27.3226	-19.1201	91.9	723	-0.1	-0.6	-0.4	61.9	416	6560	1.12013	147.065
Li-HS-86_sph_II_328.d	20	262.2	7029.85	10.85	3483	0.319	-2	917	-0.4	163.792	414	-20	26.2581	-22.7462	101.6	695	-0.1	-0.6	-0.4	62	367	6590	1.08679	148.878
Li-HS-86_sph_II_329.d	20	283	7000.29	8.34	3370	0.35	-2	765	-0.4	143.956	287	-20	-23.27	24.129	87.7	703	-0.1	-0.6	-0.18954	65.7	481	7490	1.12322	146.897
Li-HS-86_sph_II_330.d	20	612	9158.32	18.2	4084	0.31	-2	1076	-0.4	187.804	430	-20	-24.1858	27.6774	110	770	-0.1	-0.6	0.68	66.1	897	7010	0.954542	156.073
Li-HS-86_sph_II_331.d	20	642	8301.02	681	4420	-0.3	-2	863	-0.4	168.258	302	-20	-33.0688	38.3226	92.1	817	-0.1	-0.6	2.07	55.2	917	5980	0.176682	198.388
Li-HS-86_sph_II_332.d	20	458	7059.42	299.6	4176	-0.3	-2	884	-0.4	164.546	321	-20	33.3548	-21.516	100.3	792	-0.1	-0.6	2.02	64.5	928	5770	0.357008	188.579
Standard measurements								930
Source file	Spot size (µm)	Na_ppm_m23	Cl_ppm_m35	Mn_ppm_m55	Fe_ppm_m57	Co_ppm_m59	Ni_ppm_m60	Cu_ppm_m63	Ga_ppm_m69	Ge_ppm (best value)	As_ppm_m75	Se_ppm_m77	Br_ppm_m79	Br_ppm_m81	Ag_ppm_m107	Cd_ppm_m111	In_ppm (best value)	Sn_ppm_m118	Sb_ppm_m121	Hg_ppm_m202	Tl_ppm_m205	Pb_ppm_m208
NIST610_239.d	70	84400	750.285	531.1	632	397.4	498.5	506.1	535.4	437.958	276.5	104	32.8226	31.8645	227.4	327.1	413.183	482.9	418.2	0.152	51.2	466.5
NIST610_240.d	70	82500	756.788	517	584	391.9	484	498.1	519	424.85	286.3	111	29.2032	30.0194	220.6	323.5	399.242	468.1	403.1	0.133	51.7	448
NIST610_268.d	70	82100	744.964	531	575	398	498.8	498	519	427.054	403.5	161.1	29.771	31.5097	219.3	308	402.242	467	399.5	0.3	75.1	441
NIST610_269.d	70	81200	768.613	530.3	580	400	496.5	497	514.9	421.196	363.2	145.2	30.5161	30.1613	216.7	311	401.643	465.4	401	0.242	67.1	439.5
NIST610_304.d	70	79800	762.701	524.1	572	422.3	487.6	486.6	512.9	412.96	301.2	125.3	32.0774	29.9839	216.8	301.3	391.487	456.7	393.9	-0.09949	52.8	435.8
NIST610_305.d	70	80600	753.832	529.5	585	419.5	491.4	491.6	518.6	415.338	306.7	128.7	32.1129	31.829	219.1	295.6	395.865	458.5	392.3	0.137	54.8	437.9
NIST610_333.d	70	82100	753.832	534.7	582	369.6	492	488.5	514.7	412.438	310.1	121.4	31.1548	31.3323	215.9	291.3	394.855	462	389.6	0.211	60	438.2
NIST610_334.d	70	82500	762.109	521	569	375.6	488	482	506	408.378	311.7	120.1	31.0129	30.1968	214.6	278.6	389.488	455.2	384.7	0.15	57.7	420.7
MASS1_241.d	70	26230	3293.21	280.9	160900	60.26	97.4	139300	66.7	60.958	65.5	51.7	2.98065	1.9871	52.9	57.8	52.0098	62.1	63.4	57.5	61.5	72.9
MASS1_242.d	70	23440	2799.53	276.1	150600	58.9	95.3	133100	62.7	56.666	63.9	50.4	3.22903	2.05806	48.6	58.6	47.9213	57.2	59.2	55.4	58.8	66.1
MASS1_243.d	70	23530	2734.49	275.3	155100	60.1	95.5	132300	62.8	56.376	65.3	50.9	2.09355	2.23548	48.4	60.6	49.1149	58.3	58.8	57.6	60.1	66.1
MASS1_270.d	70	24430	3520.84	286	156700	60.08	99.9	136400	62.6	55.738	64.7	50.9	3.65484	2.80323	47.8	58.6	48.4195	57.1	57.6	56.5	59.1	67.2
MASS1_271.d	70	23370	3281.39	288.6	150000	60.5	97.8	131100	61.6	56.84	63.7	49.8	2.66129	2.44839	49	57.3	48.4205	57.4	58.7	55.5	58	66.3
MASS1_272.d	70	25720	3373.03	276.9	158300	59.7	97.4	131200	65.25	60.494	66	52.7	3.12258	1.95161	50.69	64.6	52.8085	61	62.5	59.3	63.6	71.5
MASS1_306.d	70	24770	3275.47	275.8	146800	60.15	97.4	124100	60.9	56.318	64	50	2.30645	1.52581	47.8	62.1	48.5252	56	57.8	55.8	58.9	66.8
MASS1_307.d	70	24700	2941.42	280.8	156100	59.35	93.7	138400	63.98	58.667	65.6	51.5	1.59677	1.56129	51.66	62.3	50.4147	59.8	60.9	57.3	60.9	69.1
MASS1_308.d	70	23840	3441.02	278.4	159700	60.37	100	139900	64.9	58.3132	64.5	50.9	3.05161	1.24194	50.3	58.2	49.5144	58.8	59.4	57.2	59.3	66.3
MASS1_335.d	70	25450	3251.82	293.6	164500	60.71	101	140100	65.6	57.7854	64.7	51.1	2.73226	1.73871	51.1	56.6	51.1119	59.4	60	55.9	59.8	68.5
MASS1_336.d	70	23520	3488.32	278	152500	59.1	97.1	133900	61.7	56.5906	66.4	51.4	3.22903	1.63226	48.2	63.9	49.5156	58	58.9	61.6	60.8	67.1
MASS1_337.d	70	24720	3257.74	282.4	151600	59.6	95	131900	61.3	55.216	62.9	50.2	2.30645	1.63226	48.5	57.5	46.9253	56.6	56.8	55.3	59.3	65.7
Blank measurements (synthetic sphalerite, >99.995%)
Source file	Spot size (µm)	Na_ppm_m23	Cl_ppm_m35	Mn_ppm_m55	Fe_ppm_m57	Co_ppm_m59	Ni_ppm_m60	Cu_ppm_m63	Ga_ppm_m69	Ge_ppm (best value)	As_ppm_m75	Se_ppm_m77	Br_ppm_m79	Br_ppm_m81	Ag_ppm_m107	Cd_ppm_m111	In_ppm (best value)	Sn_ppm_m118	Sb_ppm_m121	Hg_ppm_m202	Tl_ppm_m205	Pb_ppm_m208		SUM Metals
Pure_Sph_273.d	70	1.17	271.971	-0.057646	-1.3875	-0.02	-0.1	1.38	0.115	-0.2	0.91	-1	-1.63339	-1.36304	0.32	3.4	0.113684	0.1	-0.03	17.06	0.0126	-0.31674		24.5813
Pure_Sph_274.d	70	-0.72452	249.799	-0.065167	-1.5465	-0.02	-0.1	1.58	0.114	-0.2	0.69	-1	-1.41957	-1.10291	0.32	3.42	0.11054	0.081	-0.03	14.97	0.0108	0.151		21.4473
Pure_Sph_275.d	70	-0.73417	256.303	-0.077281	-1.4558	-0.02	-0.1	1.79	0.104	-0.2	0.69	-1	-1.35981	-1.17689	0.314	3.87	0.116282	0.07	-0.03	14.39	-0.01	0.137		21.4813
Pure_Sph_309.d	70	0.78	248.026	-0.065304	-1.2591	-0.02	-0.1	2.01	0.103	-0.222	0.8	-1	-1.80428	-1.50523	0.356	5.76	0.100536	0.088	-0.03	25.7	0.0116	0.207		35.9161
Pure_Sph_310.d	70	1.05	250.391	-0.072464	-1.5442	-0.02	-0.1	2.84	0.105	-0.212	0.78	-1	2.83871	-1.05973	0.337	5.63	0.109321	0.089	-0.03	25.84	0.0164	0.207		37.0037
Pure_Sph_311.d	70	1.13	241.226	-0.050996	-1.6156	-0.02	-0.1	2.2	0.089	-0.207	0.82	-1	-1.37621	-1.3502	0.337	5.48	0.106803	0.093	-0.03	26.28	0.0124	0.238		36.7862
Pure_Sph_338.d	70	-0.79347	250.686	-0.063842	-1.1963	-0.02	-0.1	2.6	0.115	-0.2	1	-1	1.34839	-1.46286	0.361	6.13	0.130143	0.082	-0.03	24.85	-0.01	0.195		34.6597
Pure_Sph_339.d	70	1.09	237.679	-0.055798	-1.0535	-0.02	-0.1	2.52	0.094	-0.2	0.73	-1	-1.53698	1.27742	0.35	6.21	0.116359	0.108	-0.03	24.03	0.02	0.273		35.5414
Pure_Sph_340.d	70	0.94	225.854	-0.062401	-1.2053	-0.02	-0.1	2.38	0.107	-0.2	0.9	-1	-1.38714	-1.30247	0.349	6.49	0.112943	0.078	-0.03	25.28	0.0157	0.219		36.8716

## Sheet: Uncertainties1 (2SE)
Sample Data
Source file	Spot size (µm)	Na_ppm_m23_Int2SE	Cl_ppm_m35_Int2SE	Mn_ppm_m55_Int2SE	Fe_ppm_m57_Int2SE	Co_ppm_m59_Int2SE	Ni_ppm_m60_Int2SE	Cu_ppm_m63_Int2SE	Ga_ppm_m69_Int2SE	Ge_ppm_m72_Int2SE	Ge_ppm_m73_Int2SE	As_ppm_m75_Int2SE	Se_ppm_m77_Int2SE	Br_ppm_m79_Int2SE	Br_ppm_m81_Int2SE	Ag_ppm_m107_Int2SE	Cd_ppm_m111_Int2SE	In_ppm_m113_Int2SE	In_ppm_m115_Int2SE	Sn_ppm_m118_Int2SE	Sb_ppm_m121_Int2SE	Hg_ppm_m202_Int2SE	Tl_ppm_m205_Int2SE	Pb_ppm_m208_Int2SE
Li-HS-86_sph_I_244.d	30	2.8	138.942	1.6	100	0.098	2.3e-05	7.8	0.15	2.784	2.668	1.8	4.5e-06	8.51613	7.45161	0.099	14	6.6	4.2e-07	0.052	0.12	2.2	0.026	0.29
Li-HS-86_sph_I_245.d	30	3.5	159.635	2	120	0.13	1.2e-05	16	0.034	2.668	2.552	8	2.8e-06	9.93548	7.09677	1.6	12	6.6	1.6e-07	0.073	0.86	2.8	0.048	4.5
Li-HS-86_sph_I_246.d	30	2.7	135.985	2	130	0.084	1.6e-05	14	0.23	2.436	3.944	6.4	3.8e-06	11.7097	7.45161	1.4	17	5.7	1.9e-07	0.082	1.2	4	0.056	3.9
Li-HS-86_sph_I_247.d	30	3.2	177.372	2.5	140	0.089	3.1e-05	9.7	0.31	3.248	4.292	2.8	7.6e-06	10.6452	8.87097	0.33	20	8.5	2.9e-07	0.081	0.6	4.5	0.057	1.1
Li-HS-86_sph_I_248.d	30	2.7	115.292	1.3	100	0.091	1.8e-05	25	0.13	3.596	3.828	14	4.7e-06	8.51613	6.3871	2.4	14	5.2	1.1e-07	0.059	1.1	7.9	0.087	7.4
Li-HS-86_sph_I_249.d	30	3.5	141.898	2.1	130	0.074	2e-05	7.8	0.35	0.9396	1.508	4.6	5.8e-06	10.6452	6.3871	0.67	18	5.8	8.7e-08	0.088	0.61	8.8	0.056	1.4
Li-HS-86_sph_I_250.d	30	4.5	212.847	0.5	150	0.19	4.1e-05	4.2	0.24	2.436	3.364	4.4	1.3e-05	17.3871	10.6452	1.3	16	5.2	0.0063	0.13	0.19	28	0.49	16
Li-HS-86_sph_I_251.d	30	2.3	162.591	0.28	81	0.11	0.07	51	8.2e-06	2.32	3.132	60	7.8e-06	8.51613	7.45161	9.1	11	4.8	7.2e-08	0.055	1.8	41	0.9	30
Li-HS-86_sph_I_252.d	30	8.1	153.723	0.32	93	0.15	0.061	2.3	0.008	0.6844	0.9512	3.5	4.7e-06	8.87097	7.45161	0.5	9.4	3.8	8.2e-08	0.068	0.053	16	0.27	22
Li-HS-86_sph_I_253.d	30	8	147.81	0.28	100	0.099	1.9e-05	18	0.01	1.856	3.48	4.9	6.7e-06	7.09677	7.45161	0.45	10	3.8	1.5e-07	0.053	0.1	10	1	1.2
Li-HS-86_sph_I_254.d	50	2.3	56.1679	0.12	67	0.086	0.04	5.5	0.0064	2.9	3.248	1.9	1.9e-06	3.01613	2.98065	0.24	8.4	3.4	0.0017	0.026	0.037	8.1	0.47	1
Li-HS-86_sph_I_255.d	50	0.5	38.4307	0.082	39	0.091	0.024	1.7	9.5e-07	0.3828	0.5104	2.1	1e-06	2.2	1.66774	0.24	7.3	3	4.1e-08	0.018	0.016	4	0.062	14
Li-HS-86_sph_I_256.d	30	4.5	248.321	0.49	190	0.21	0.17	6.9	0.22	1.276	2.204	11	8.5e-06	16.6774	13.8387	0.85	21	6.3	3.8e-07	0.092	0.34	6.8	0.28	7.4
Li-HS-86_sph_I_257.d	30	6	280.839	0.65	150	0.25	5.4e-05	4.7	0.035	1.276	1.392	9.6	2.3e-05	14.5484	11	0.78	20	7.5	0.0041	0.089	0.21	7.8	0.25	1.2
Li-HS-86_sph_I_258.d	50	0.67	50.2555	0.098	36	0.087	0.027	12	0.015	0.8584	1.044	24	1.5e-06	2.48387	1.95161	2.3	9.4	4	6e-08	0.016	0.12	2.7	0.11	14
Li-HS-86_sph_I_259.d	50	0.79	28.9708	0.061	25	0.054	0.039	2.3	0.27	0.464	0.522	0.94	8.3e-07	1.45484	1.27742	0.081	7.9	3	6e-08	0.013	0.12	6.3	0.028	0.37
Li-HS-86_sph_I_260.d	30	4.5	133.029	0.67	74	0.086	1.2e-05	81	0.08	7.656	8.004	83	5.7e-06	8.51613	7.80645	9.5	7.5	3	4.4e-07	0.063	0.71	7.7	1.7	71
Li-HS-86_sph_I_261.d	30	1.9	127.117	0.29	65	0.052	1.3e-05	3.9	5.1e-06	1.856	3.132	7	5.8e-06	9.93548	5.32258	1.1	8.6	3.5	4.7e-07	0.058	0.056	11	0.4	53
Li-HS-86_sph_I_262.d	30	2.3	165.547	0.21	55	0.088	1.4e-05	8.4	0.31	3.132	3.364	2.5	5.4e-06	8.16129	8.16129	0.19	10	3.4	0.0045	0.078	0.13	16	0.037	0.4
Li-HS-86_sph_I_263.d	30	2.8	162.591	0.34	70	0.069	1.4e-05	6.3	5.1e-06	2.668	3.828	7.4	5.4e-06	10.2903	7.45161	1.2	9.9	3.8	6e-07	0.046	0.095	32	0.76	55
Li-HS-86_sph_I_264.d	30	3.3	144.854	0.24	58	0.13	0.062	4.2	0.32	1.276	1.856	3.7	4.9e-06	8.87097	7.09677	0.3	11	4.4	5.9e-07	0.067	0.14	4100	0.045	0.84
Li-HS-86_sph_I_265.d	30	3.5	245.365	0.43	170	0.15	2e-05	2.2	0.025	1.276	2.088	3.9	7.9e-06	12.4194	9.58065	0.53	16	7.6	1e-06	0.072	0.22	18	0.04	2.1
Li-HS-86_sph_I_266.d	30	2.2	135.985	0.53	110	0.098	2.6e-05	21	9.5e-06	1.392	2.32	23	9.3e-06	7.45161	6.3871	2.9	10	5.1	1.3e-06	0.052	1.1	6.9	1	18
Li-HS-86_sph_I_267.d	30	3.6	153.723	2	120	0.029	1.3e-05	36	0.034	4.756	5.684	40	4.9e-06	8.87097	5.67742	9.1	13	6.2	7.9e-07	0.057	0.39	4.9	0.74	70
Li-HS-86_sph_II_276.d	20	18	857.299	2.9	590	0.076	1.6	160	6.1e-05	6.496	10.44	26	4.2e-05	85.1613	46.129	14	52	22	1.6e-05	0.31	1.2	2.3	8.3	950
Li-HS-86_sph_II_277.d	20	10	443.431	1.1	400	0.059	6.1e-05	450	0.041	3.364	7.424	44	1.5e-05	27.6774	17.7419	7.3	33	13	6.2e-06	0.14	0.47	0.85	5.6	100
Li-HS-86_sph_II_278.d	20	5.6	274.927	0.72	410	0.052	0.75	360	0.019	2.552	4.292	35	1e-05	19.1613	14.9032	2.7	21	6.2	4.3e-06	0.14	0.35	1.2	1.7	180
Li-HS-86_sph_II_279.d	20	8.9	620.803	1.6	420	0.046	0.12	250	0.07	5.104	7.192	44	1.8e-05	30.5161	25.5484	5	39	15	0.0098	0.23	0.7	0.93	6.7	85
Li-HS-86_sph_II_280.d	20	19	325.182	0.89	240	0.11	0.37	130	0.029	3.712	5.452	41	0.4	24.129	15.9677	3.7	17	8.5	7.7e-06	0.11	0.41	1	3.2	98
Li-HS-86_sph_II_281.d	20	21	532.117	1.2	160	0.049	0.17	250	0.029	4.64	6.96	110	1.3e-05	39.0323	31.2258	8.3	16	7.9	6.2e-06	0.12	0.3	1.2	6.7	360
Li-HS-86_sph_II_282.d	20	38	269.015	9.5	170	0.051	0.067	27	0.031	6.496	8.12	7.9	1.3e-05	14.9032	13.129	3	18	7.3	0.0069	0.12	0.41	0.96	9	130
Li-HS-86_sph_II_283.d	20	9.3	502.555	1.5	300	0.17	5.3e-05	36	1.9e-05	3.48	8.12	13	1.2e-05	18.0968	13.129	3.9	24	11	0.011	0.12	0.21	1.3	3.6	130
Li-HS-86_sph_II_284.d	20	10	561.679	1.7	150	0.056	3.2e-05	13	0.03	4.176	6.96	4.3	8.8e-06	28.3871	19.1613	2.1	17	6.5	4.5e-06	0.12	0.15	1.2	32	190
Li-HS-86_sph_II_285.d	20	17	354.745	1.8	150	0.12	0.22	250	0.038	7.888	12.76	77	7.8e-06	19.1613	13.4839	4.2	18	6.1	0.004	0.11	0.18	1.3	23	130
Li-HS-86_sph_II_286.d	20	14	709.489	1.8	180	0.26	1.5	370	1.1e-05	7.192	11.6	140	7e-06	35.129	28.0323	4.2	13	5.9	0.0029	0.1	0.27	1.3	14	130
Li-HS-86_sph_II_287.d	20	26	650.365	4.2	230	0.22	0.71	100	0.17	4.988	9.744	58	1.5e-05	34.0645	32.6452	7.4	26	10	8.2e-06	0.18	0.43	1.3	9.9	480
Li-HS-86_sph_II_288.d	20	20	502.555	6.5	160	0.11	4.4e-05	21	0.04	3.944	4.756	9.3	1.3e-05	31.5806	25.5484	3.1	24	8.1	6.4e-06	0.14	0.45	1.1	12	180
Li-HS-86_sph_II_289.d	20	34	472.993	4.6	190	0.21	0.89	140	0.039	9.976	11.6	89	7.4e-06	25.1935	20.2258	13	15	6.9	3.8e-06	0.13	0.25	0.96	19	120
Li-HS-86_sph_II_290.d	20	30	384.307	1.5	150	0.096	0.76	580	0.017	5.336	6.264	190	9.6e-06	19.1613	15.6129	4.8	16	6.4	5.2e-06	0.11	1.2	1.3	0.58	16
Li-HS-86_sph_II_291.d	20	46	1005.11	1.7	180	0.078	2.9e-05	560	0.037	4.408	7.308	230	1e-05	53.2258	24.4839	5.8	15	6.4	0.0087	0.13	1	1.1	0.7	15
Li-HS-86_sph_II_292.d	20	58	413.869	1.1	360	0.11	6.3e-05	1500	0.047	6.032	10.556	600	2.3e-05	19.1613	13.8387	10	25	10	0.0072	0.17	2.2	1.5	0.94	30
Li-HS-86_sph_II_293.d	20	24	532.117	1	250	0.12	0.068	830	3e-05	6.264	9.976	360	2.4e-05	34.0645	20.9355	8.7	27	8.1	1.2e-05	0.15	1.4	1.4	0.7	25
Li-HS-86_sph_II_294.d	20	32	472.993	0.68	150	0.07	0.089	450	0.034	4.64	6.148	210	1e-05	28.3871	15.9677	4.7	17	7.1	5.3e-06	0.12	1	1.3	0.49	13
Li-HS-86_sph_II_295.d	20	36	1330.29	0.8	160	0.063	3.6e-05	490	0.038	4.524	6.032	250	1.4e-05	30.5161	46.129	5.2	17	5.7	0.0028	0.12	1.1	1.4	0.46	13
Li-HS-86_sph_II_296.d	20	61	295.62	2.7	330	0.13	6.3e-05	980	2.8e-05	7.076	13.92	410	0.85	15.6129	12.0645	12	27	11	1.2e-05	0.21	1.6	1.2	4.3	4100
Li-HS-86_sph_II_297.d	20	19	1064.23	9.2	230	0.071	0.45	470	0.017	6.496	8.236	220	1.3e-05	78.0645	19.871	15	20	10	0.0027	0.13	0.48	1.2	21	12000
Li-HS-86_sph_II_298.d	20	19	443.431	7.2	160	0.087	0.15	300	1.2e-05	9.744	10.208	170	1.1e-05	95.8065	42.5806	21	19	7.9	5.7e-06	0.13	0.38	1.2	23	110
Li-HS-86_sph_II_299.d	20	31	354.745	12	230	0.19	5.4e-05	66	0.086	4.872	6.728	30	2.8e-05	18.4516	11.7097	3.8	22	11	0.0084	0.21	0.34	1.6	18	120
Li-HS-86_sph_II_300.d	20	21	768.613	8	230	0.13	5.3e-05	36	0.068	2.9	4.292	19	2.6e-05	33	25.1935	3.4	23	8.2	0.0064	0.14	0.25	1.9	16	160
Li-HS-86_sph_II_301.d	20	48	650.365	4.5	150	0.091	0.037	100	0.043	4.64	3.944	90	9.9e-06	49.6774	28.0323	7.8	15	6.5	0.0074	0.12	0.26	1.6	11	110
Li-HS-86_sph_II_302.d	20	28	384.307	2.8	130	0.18	0.32	40	0.013	2.784	4.408	10	1.2e-05	20.9355	13.129	2.1	14	5.8	6e-06	0.11	0.16	2	8	97
Li-HS-86_sph_II_303.d	20	18	443.431	1.8	140	0.075	0.072	32	0.042	2.088	3.828	30	1.7e-05	30.871	27.6774	2.6	15	6.9	0.0027	0.11	0.2	2	9.9	84
Li-HS-86_sph_II_312.d	20	14	886.861	2.6	170	0.094	4e-05	73	2.2e-05	5.8	8.352	44	1.6e-05	46.129	33.3548	2.5	19	8.5	1.4e-05	0.14	0.28	3.1	26	140
Li-HS-86_sph_II_313.d	20	14	443.431	1.6	150	0.066	2e-05	300	0.028	3.828	6.728	130	1.3e-05	24.4839	16.6774	3.6	16	6.5	8.3e-06	0.1	0.29	2.4	36	170
Li-HS-86_sph_II_314.d	20	11	413.869	1.7	200	0.11	0.21	23	0.021	3.48	6.612	15	1.6e-05	17.7419	12.4194	3.1	21	7.8	9.6e-06	0.18	0.18	2.1	37	170
Li-HS-86_sph_II_315.d	20	15	502.555	2.7	180	0.1	2.1e-05	17	1.3e-05	6.496	7.888	11	1.5e-05	28.7419	17.0323	1.9	22	8.7	9.2e-06	0.16	0.22	3.3	18	140
Li-HS-86_sph_II_316.d	20	9.5	620.803	1.4	140	0.058	2.4e-05	58	0.0097	3.016	5.22	32	1.6e-05	35.129	27.3226	1.8	13	5.8	0.006	0.12	0.29	2.6	36	190
Li-HS-86_sph_II_317.d	20	12	354.745	1.5	190	0.048	0.11	420	1.2e-05	4.64	8.584	190	1.4e-05	15.6129	14.9032	9	16	5.3	0.0074	0.13	0.33	2.2	32	130
Li-HS-86_sph_II_318.d	20	22	443.431	4.2	200	0.044	1.9e-05	500	0.057	6.612	7.424	240	1.3e-05	22.3548	15.6129	27	19	8.6	8.4e-06	0.14	1.3	2.6	20	200
Li-HS-86_sph_II_319.d	20	10	443.431	1.3	210	0.043	0.24	230	0.12	4.408	6.612	97	1.6e-05	23.0645	17.3871	9.1	22	7.7	1.1e-05	0.17	1.3	2.3	29	130
Li-HS-86_sph_II_320.d	20	12	384.307	1.6	260	0.064	1.3	260	0.04	5.8	9.512	86	1.5e-05	26.6129	13.129	13	16	8.6	0.0086	0.14	0.74	2.5	43	220
Li-HS-86_sph_II_321.d	20	11	443.431	1	140	0.042	1.5e-05	350	0.021	4.988	7.308	210	1.1e-05	22.7097	16.6774	2.4	14	6.8	0.0032	0.091	0.21	2.5	29	160
Li-HS-86_sph_II_322.d	20	19	620.803	0.86	120	0.028	1.3e-05	290	7.8e-06	4.292	8.7	120	9.3e-06	28.0323	23.4194	2.8	12	5.5	6.3e-06	0.1	0.33	2.8	40	150
Li-HS-86_sph_II_323.d	20	22	650.365	0.84	120	0.045	0.068	100	0.028	6.844	9.28	44	1.2e-05	22.3548	18.0968	2.9	15	6.2	0.005	0.1	0.28	2.5	26	180
Li-HS-86_sph_II_324.d	20	15	739.051	0.71	130	0.04	0.11	190	1.2e-05	4.408	7.424	80	1.4e-05	31.2258	29.4516	3.1	16	6.4	1e-05	0.12	0.19	2.9	20	110
Li-HS-86_sph_II_325.d	20	27	857.299	1	120	0.065	2.4e-05	22	1.6e-05	3.596	7.192	14	2e-05	46.129	27.6774	2.9	19	8	1.3e-05	0.18	0.22	4	25	190
Li-HS-86_sph_II_326.d	20	8.5	502.555	0.57	100	0.037	1.3e-05	22	0.014	3.248	4.06	13	1.2e-05	25.5484	18.8065	1.7	12	5.6	0.0062	0.1	0.13	2.6	10	140
Li-HS-86_sph_II_327.d	20	9.8	384.307	0.83	110	0.066	1.7e-05	24	1.1e-05	4.408	7.424	16	1.5e-05	16.3226	15.6129	2	14	6.5	0.0064	0.13	0.12	2.9	23	290
Li-HS-86_sph_II_328.d	20	9.9	443.431	0.92	89	0.071	1.5e-05	25	0.02	4.06	6.148	21	1.5e-05	21.6452	15.6129	2.7	18	6.5	9.8e-06	0.12	0.12	2.9	13	170
Li-HS-86_sph_II_329.d	20	12	472.993	0.72	100	0.079	1.3e-05	15	0.017	3.132	5.336	8.7	1.3e-05	21.2903	14.5484	2.4	15	6.6	0.0061	0.12	0.13	2.9	18	160
Li-HS-86_sph_II_330.d	20	40	443.431	1.1	99	0.06	0.067	69	0.038	4.06	6.148	31	1.1e-05	19.5161	13.4839	2.3	11	5.3	0.0084	0.1	0.13	2.9	26	150
Li-HS-86_sph_II_331.d	20	23	857.299	23	210	0.082	1.7e-05	21	1.2e-05	5.336	9.164	14	1.7e-05	35.4839	25.9032	3.1	28	10	1.1e-05	0.2	0.26	3.6	31	160
Li-HS-86_sph_II_332.d	20	16	443.431	8.1	79	0.028	1.5e-05	36	0.035	5.336	6.496	19	1.5e-05	31.5806	18.0968	3.1	15	5.1	1e-05	0.11	0.28	2.4	19	100
Standard measurements
Source file	Spot size (µm)	Na_ppm_m23_Int2SE	Cl35_CPS_Int2SE	Mn_ppm_m55_Int2SE	Fe_ppm_m57_Int2SE	Co_ppm_m59_Int2SE	Ni_ppm_m60_Int2SE	Cu_ppm_m63_Int2SE	Ga_ppm_m69_Int2SE	Ge_ppm_m72_Int2SE	Ge_ppm_m73_Int2SE	As_ppm_m75_Int2SE	Se_ppm_m77_Int2SE	Br79_CPS_Int2SE	Br81_CPS_Int2SE	Ag_ppm_m107_Int2SE	Cd_ppm_m111_Int2SE	In_ppm_m113_Int2SE	In_ppm_m115_Int2SE	Sn_ppm_m118_Int2SE	Sb_ppm_m121_Int2SE	Hg_ppm_m202_Int2SE	Tl_ppm_m205_Int2SE	Pb_ppm_m208_Int2SE
NIST610_239.d	70	1600	27.1971	9.5	23	6.6	8.9	9.9	9.5	8.352	8.932	5.3	3.1	1.95161	1.70323	5.2	6.7	6.5	8.3	9.4	7.3	0.033	1.2	8.6
NIST610_240.d	70	1700	32.5182	11	20	8.4	9.4	9.9	12	9.164	9.628	6.6	2.9	1.73871	1.49032	6	6.6	7.9	9.1	9.4	8.5	0.033	1.2	11
NIST610_268.d	70	1700	29.562	10	14	7.5	9.4	10	11	9.28	10.092	7.9	4.9	1.66774	1.63226	5.9	7.1	7.5	9.8	11	9.4	0.11	2	11
NIST610_269.d	70	1300	26.6058	8.5	10	6.6	7.9	8.4	9.9	8.004	9.048	6.5	4.2	1.56129	1.45484	5.1	7.2	4.9	7.7	7.5	7.6	0.072	1.3	8.6
NIST610_304.d	70	1700	29.562	9.7	14	8.3	8.9	8.9	9.5	9.164	9.28	6.5	3.7	1.63226	1.63226	5	6.4	6.6	9.2	9.6	8.2	0.03	1.3	9.5
NIST610_305.d	70	1400	26.6058	9.3	13	6.9	8.6	8.4	8.9	8.352	7.54	5.2	3.5	1.9871	1.66774	4.3	5.4	5.7	7.7	8.2	6.3	0.03	1.1	8.7
NIST610_333.d	70	1600	24.8321	9.1	13	5.3	7.5	8.3	8.9	8.7	7.54	5.5	3.3	1.84516	1.38387	5.5	6.1	5.2	7.7	8.4	7.5	0.046	1.3	8.4
NIST610_334.d	70	1800	24.8321	10	14	6.9	8.7	10	11	10.092	8.816	6.5	3.5	2.02258	1.52581	4.8	5.4	6.6	8.5	9.9	7.4	0.042	1.4	8.4
MASS1_241.d	70	580	85.7299	3.2	2700	0.66	1.5	2400	1.2	1.276	1.276	1.3	1.6	0.851613	0.567742	1	1.4	0.93	1.2	1.2	1.3	1.8	1.9	2.3
MASS1_242.d	70	550	85.7299	5.5	3500	1.2	2	3200	1.4	1.392	1.276	1.8	1.8	0.63871	0.567742	1.4	1.5	1.3	1.2	1.3	1.6	2.2	1.8	1.8
MASS1_243.d	70	720	76.8613	5.6	3500	1	1.6	2600	1.5	1.276	1.276	1.8	1.7	0.709677	0.63871	1.1	1.6	1.2	1.3	1.3	1.3	1.9	1.8	2.5
MASS1_270.d	70	670	73.9051	5.6	4300	0.97	1.9	3300	1.5	1.392	1.508	1.7	1.8	0.674194	0.532258	1.3	1.8	1.3	1.3	1.5	1.6	1.2	1.6	1.8
MASS1_271.d	70	570	79.8175	5.5	4000	1.2	2.1	2700	1.7	1.392	1.392	1.5	1.5	0.532258	0.532258	1.3	1.8	1.1	1.5	1.4	1.5	1.7	1.6	2.5
MASS1_272.d	70	550	65.0365	4.6	2300	0.88	1.6	1800	0.93	1.16	1.276	1.2	1.7	0.887097	0.709677	0.87	1.5	0.96	1.1	1.2	1.5	1.5	1.7	1.9
MASS1_306.d	70	750	124.161	4.5	3700	0.85	1.3	2600	1.6	1.276	1.508	1.7	2	0.780645	0.567742	1.3	2.3	1.4	1.2	1.5	1.4	2.2	2	2
MASS1_307.d	70	520	67.9927	4.8	2400	0.81	1.3	2300	0.98	0.9744	1.0788	1.1	1.4	0.709677	0.532258	0.82	1.6	0.76	1	1	1.2	1.2	1.3	1.9
MASS1_308.d	70	670	65.0365	5	3100	0.84	1.6	2700	1.1	0.9048	1.276	1.6	1.6	0.745161	0.532258	1.1	1.6	1.1	1.1	1.1	1.2	1.8	1.7	1.9
MASS1_335.d	70	610	56.1679	5.2	3100	0.78	1.3	2400	1.2	1.16	1.102	1.1	1.5	0.603226	0.46129	1.1	1.1	1	1.1	1.1	1.1	1.5	1.4	1.6
MASS1_336.d	70	600	88.6861	5.3	3700	1	1.8	2700	1.6	1.1484	1.276	1.4	1.5	0.745161	0.46129	1.1	1.5	1.3	1.2	1.5	1.4	2.4	1.8	2
MASS1_337.d	70	760	112.336	5	4000	1.2	1.8	3500	1.6	1.392	1.624	2.1	1.9	0.709677	0.532258	1.3	1.6	1.2	1.7	1.5	1.6	2.4	2.3	2.2
Blank measurements (synthetic sphalerite, >99.995%)
Source file	Spot size (µm)	Na_ppm_m23_Int2SE	Cl35_CPS_Int2SE	Mn_ppm_m55_Int2SE	Fe_ppm_m57_Int2SE	Co_ppm_m59_Int2SE	Ni_ppm_m60_Int2SE	Cu_ppm_m63_Int2SE	Ga_ppm_m69_Int2SE	Ge_ppm_m72_Int2SE	Ge_ppm_m73_Int2SE	As_ppm_m75_Int2SE	Se_ppm_m77_Int2SE	Br79_CPS_Int2SE	Br81_CPS_Int2SE	Ag_ppm_m107_Int2SE	Cd_ppm_m111_Int2SE	In_ppm_m113_Int2SE	In_ppm_m115_Int2SE	Sn_ppm_m118_Int2SE	Sb_ppm_m121_Int2SE	Hg_ppm_m202_Int2SE	Tl_ppm_m205_Int2SE	Pb_ppm_m208_Int2SE
Pure_Sph_273.d	70	0.29	18.0328	0.031	0.67	0.0014	0.0089	0.17	0.012	0.04176	0.02552	0.17	2.8e-07	1.34839	0.745161	0.022	0.24	0.084	0.0074	0.014	0.0087	0.48	0.0033	0.013
Pure_Sph_274.d	70	0.29	16.8504	0.023	0.54	0.0015	0.0068	0.18	0.011	0.03712	0.0232	0.15	3e-07	1.02903	0.780645	0.018	0.19	0.1	0.0062	0.013	0.0089	0.47	0.0022	0.012
Pure_Sph_275.d	70	0.3	23.0584	0.026	0.53	0.002	1.2e-06	0.37	0.012	0.03712	0.03016	0.14	0.074	0.958065	0.674194	0.023	0.25	0.11	0.0074	0.015	0.0076	0.4	0.0025	0.01
Pure_Sph_309.d	70	0.32	27.1971	0.029	0.66	0.0017	0.0095	0.53	0.014	0.0464	0.0232	0.23	4.3e-07	1.20645	1.1	0.026	0.3	0.12	0.0076	0.016	0.0096	0.46	0.0034	0.015
Pure_Sph_310.d	70	0.36	21.2847	0.033	0.5	1.8e-06	7.2e-07	0.52	0.013	0.0522	0.01972	0.23	4.8e-07	1.38387	0.887097	0.026	0.29	0.11	0.009	0.013	0.009	0.49	0.0038	0.021
Pure_Sph_311.d	70	0.36	23.0584	0.033	0.56	1.7e-06	0.008	0.3	0.01	0.04872	0.0232	0.22	4.6e-07	1.13548	0.993548	0.023	0.23	0.12	0.0059	0.016	0.0098	0.71	0.0027	0.021
Pure_Sph_338.d	70	0.36	22.1715	0.022	0.46	0.0013	4e-07	0.39	0.012	0.03828	0.0232	0.18	5.5e-07	1.17097	0.709677	0.025	0.3	0.11	0.0073	0.014	0.0088	0.61	0.0023	0.018
Pure_Sph_339.d	70	0.24	20.9891	0.024	0.56	0.001	0.0095	0.26	0.011	0.03364	0.02668	0.16	0.066	1.06452	0.816129	0.026	0.28	0.13	0.0062	0.014	0.0088	0.5	0.0032	0.022
Pure_Sph_340.d	70	0.31	21.2847	0.026	0.43	0.0016	4.5e-07	0.28	0.012	0.04408	0.0232	0.17	6.7e-07	1.20645	0.780645	0.027	0.33	0.13	0.0066	0.018	0.0084	0.47	0.0034	0.018

## Sheet: Detection limits1
Sample Data
Source file	Spot size (µm)	Na_ppm_m23_LOD	Cl_ppm_m35_LOD	Mn_ppm_m55_LOD	Fe_ppm_m57_LOD	Co_ppm_m59_LOD	Ni_ppm_m60_LOD	Cu_ppm_m63_LOD	Ga_ppm_m69_LOD	Ge_ppm_m72_LOD	Ge_ppm_m73_LOD	As_ppm_m75_LOD	Se_ppm_m77_LOD	Br_ppm_m79_LOD	Br_ppm_m81_LOD	Ag_ppm_m107_LOD	Cd_ppm_m111_LOD	In_ppm_m113_LOD	In_ppm_m115_LOD	Sn_ppm_m118_LOD	Sb_ppm_m121_LOD	Hg_ppm_m202_LOD	Tl_ppm_m205_LOD	Pb_ppm_m208_LOD
Li-HS-86_sph_I_244.d	30	6.4536	364.305	0.56414	67.327	0.3	2	2.6936	0.4	0.9	3	4.085	20	12.8005	11.0028	0.4	4	1	0.1	0.6	0.4	1.0795	0.2	0.2
Li-HS-86_sph_I_245.d	30	5.7115	437.193	0.61389	12.252	0.3	2	2.4175	0.4	0.9	3	3.3512	20	14.558	11.9822	0.4	4	1	0.1	0.6	0.4	1.1987	0.2	0.2
Li-HS-86_sph_I_246.d	30	5.9404	419.592	0.64716	11.223	0.3	2	2.2337	0.4	0.9	3	3.0057	20	13.1666	10.1672	0.4	4	1	0.12891	0.6	0.4	1.0986	0.2	0.2
Li-HS-86_sph_I_247.d	30	5.0415	362.425	0.56596	13.475	0.3	2	2	0.4	0.9	3	4.5321	20	13.5311	12.0826	0.4	4	1	0.1	0.6	0.4	0.90395	0.2	0.2
Li-HS-86_sph_I_248.d	30	5.6414	379.925	0.53623	10.708	0.3	2	2.1843	0.4	0.9	3	3.43	20	15.956	9.32942	0.4	4	1	0.1	0.6	0.4	0.91541	0.2	0.2
Li-HS-86_sph_I_249.d	30	6.3015	397.958	0.57145	12.309	0.3	2	2	0.4	0.9	3	2.7078	20	12.8366	12.3548	0.4	4	1	0.1	0.6	0.4	0.84319	0.2	0.2
Li-HS-86_sph_I_250.d	30	6.6199	464.845	0.96713	14.997	0.3	2	2.2573	0.4	0.9	3	4.5959	20	19.7478	12.5954	0.4	4	1	0.1	0.6	0.4	1.0115	0.2	0.2
Li-HS-86_sph_I_251.d	30	4.9869	388.297	0.61261	7.99	0.3	2	30.437	0.4	0.9	3	3.4167	20	12.5968	10.5007	0.4	4	1	0.1	0.6	0.4	0.86715	0.2	0.2
Li-HS-86_sph_I_252.d	30	5.3612	362.141	0.62633	10.562	0.3	2	13.893	0.4	0.9	3	3.8674	20	12.1749	11.9478	0.4	4	1	0.1	0.6	0.4	0.81185	0.2	0.2
Li-HS-86_sph_I_253.d	30	5.4906	300.155	0.48481	9.1046	0.3	2	2	0.4	0.9	3	3.5537	20	15.2134	11.0809	0.4	4	1	0.1	0.6	0.4	0.99323	0.2	0.2
Li-HS-86_sph_I_254.d	50	1.4694	114.866	0.14804	2.6865	0.06	0.4	0.3739	0.06	0.18	0.7	0.788	2	3.60126	2.98185	0.1	0.3	0.2	0.02	0.08	0.08	0.23638	0.02	0.02
Li-HS-86_sph_I_255.d	50	1.2129	85.6767	0.11342	2.3035	0.06	0.4	0.29241	0.06	0.1	0.7	0.78756	2	3.05112	2.02755	0.1	0.3	0.2	0.02	0.08	0.08	0.20872	0.02	0.02
Li-HS-86_sph_I_256.d	30	7.3086	640.077	0.80197	14.164	0.3	2	2.3124	0.4	0.9	3	4.803	20	18.0074	14.5686	0.4	4	1	0.1	0.6	0.4	1.2443	0.2	0.2
Li-HS-86_sph_I_257.d	30	7.3614	684.125	0.91344	12.532	0.3	2	2.0233	0.4	0.9	3	4.8093	20	22.7292	15.224	0.4	4	1	0.1	0.6	0.4	1.4763	0.2	0.2
Li-HS-86_sph_I_258.d	50	1.0491	89.9159	0.12996	2.3873	0.06	0.4	0.27512	0.06	0.1	0.7	0.73752	2	3.18056	2.29055	0.1	0.3	0.2	0.02	0.23296	0.08	0.18003	0.02	0.02
Li-HS-86_sph_I_259.d	50	0.85208	72.6339	0.12424	1.9091	0.06	0.4	0.27975	0.06	0.1	0.7	0.60941	2	2.3848	2.36631	0.1	0.3	0.2	0.02	0.08	0.08	0.1719	0.14939	0.02
Li-HS-86_sph_I_260.d	30	5.0414	369.939	0.55968	7.9106	0.3	2	1.5154	0.4	0.9	3	2.8097	20	14.179	10.863	0.4	4	1	0.1	0.6	0.4	0.84206	0.2	0.2
Li-HS-86_sph_I_261.d	30	4.9976	410.771	0.61632	9.206	0.3	2	43.98	0.4	0.9	3	3.5308	20	13.5367	13.6141	0.4	4	1	0.1	0.6	0.4	0.91673	0.2	0.2
Li-HS-86_sph_I_262.d	30	5.3932	377.596	0.62646	10.639	0.3	2	1.5881	0.4	0.9	3	3.0278	20	13.2621	12.7139	0.4	4	1	0.1	0.6	0.4	1.0244	0.2	0.2
Li-HS-86_sph_I_263.d	30	4.8641	416.163	0.5445	10.76	0.3	2	1.478	0.4	0.9	3	3.5412	20	15.9567	13.1265	0.4	4	1	0.1	0.6	0.4	0.83158	0.2	0.5518
Li-HS-86_sph_I_264.d	30	4.4784	411.137	0.69197	9.3382	0.3	2	1.4278	0.4	0.9	3	3.1755	20	12.5098	10.147	0.4	4	1	0.1	0.6	0.4	0.89964	0.2	0.2
Li-HS-86_sph_I_265.d	30	7.1981	424.475	0.74327	13.891	0.3	2	1.7387	0.4	0.9	3	4.2452	20	16.2466	12.6287	0.4	4	1	0.1	0.6	0.4	1.2838	0.2	0.2
Li-HS-86_sph_I_266.d	30	5.5138	354.804	0.52183	11.287	0.3	2	1.4244	0.4	0.9	3	3.2009	20	11.11	10.1207	0.4	4	1	0.1	0.6	0.4	0.97001	0.2	0.2
Li-HS-86_sph_I_267.d	30	4.4303	416.5	0.53882	11.227	0.3	2	1.1008	0.4	0.9	3	3.5357	20	12.3235	11.0713	0.4	4	1	0.1	0.6	0.4	0.90792	0.2	0.2
Li-HS-86_sph_II_276.d	20	253.35	1741.5	2.5159	67.328	0.3	2	14.297	0.4	2.60745	3	13.829	20	63.36	48.3965	0.48491	5.1584	2.2925	0.1	0.63478	0.81717	4.9641	0.2	0.26409
Li-HS-86_sph_II_277.d	20	20.822	839.207	1.4493	1189.9	0.3	2	11.685	0.4	1.76993	3	8.3282	20	27.5142	29.9285	0.4	3.0627	1.2548	0.1	0.6	0.4	2.5167	0.2	0.33449
Li-HS-86_sph_II_278.d	20	16.961	760.868	1.2067	43.449	0.3	2	11.415	0.4	1.51566	3	6.568	20	24.5084	22.8545	0.4	2.9204	1.5531	0.1	0.6	0.4	1.8551	0.2	0.24873
Li-HS-86_sph_II_279.d	20	23.806	1062.34	1.7437	46.169	0.3	2	18.797	0.4	1.99102	3	9.1747	20	29.0553	30.8461	0.4	4.0152	1.9102	0.1	0.6	0.51831	2.5777	0.2	0.24753
Li-HS-86_sph_II_280.d	20	18.871	757.793	1.1966	40.825	0.3	2	13.985	0.4	1.50081	3	7.3309	20	22.7941	21.6984	0.4	3.897	1.5945	0.1	0.6	0.4	2.0017	0.2	0.2
Li-HS-86_sph_II_281.d	20	16.991	681.523	1.2963	42.386	0.3	2	18.845	0.4	1.15727	3	7.2052	20	21.5125	23.0695	0.4	3.8592	1.5734	0.1	0.6	0.4	1.685	0.2	0.2
Li-HS-86_sph_II_282.d	20	17.231	698.374	1.0868	41.109	0.3	2	21.877	0.4	1.36602	3	6.436	20	19.3909	22.6575	0.4	2.9701	1.6089	0.1	0.6	0.4	1.6898	0.2	0.2
Li-HS-86_sph_II_283.d	20	21.228	982.347	2.1421	48.799	0.3	2	35.261	0.4	2.28729	3	10.487	20	36.1758	35.5655	0.4	5.7961	1.8616	0.1	0.6	0.56015	2.6507	0.2	0.23342
Li-HS-86_sph_II_284.d	20	14.687	601.706	1.1123	34.8	0.3	2	25.172	0.4	1.22206	3	6.3665	20	22.3119	19.2511	0.4	4.0891	1.215	0.1	0.6	0.4	1.5519	0.2	0.2
Li-HS-86_sph_II_285.d	20	16.825	556.488	1.2749	27.539	0.3	2	31.89	0.4	1.47633	3	6.5325	20	21.9273	21.7875	0.4	3.6616	1.3899	0.1	0.6	0.4	1.7063	0.2	0.2
Li-HS-86_sph_II_286.d	20	14.019	600.937	0.94281	27.166	0.3	2	29.845	0.4	1.45708	3	6.1034	20	19.9501	20.1169	0.4	3.122	1.4353	0.1	0.6	0.4	1.6165	0.2	0.2
Li-HS-86_sph_II_287.d	20	21.467	760.099	1.2362	46.595	0.3	2	45.868	0.4	1.52958	3	7.8756	20	27.9496	25.7187	0.4	5.0595	2.2129	0.1	0.6	0.4	2.038	0.2	0.2
Li-HS-86_sph_II_288.d	20	17.637	878.288	1.6656	42.376	0.3	2	43.048	0.4	1.61843	3	8.4852	20	28.7984	26.6463	0.4	3.2793	1.3494	0.1	0.6	0.4	1.6434	0.2	0.2
Li-HS-86_sph_II_289.d	20	17.547	700.088	1.0352	31.985	0.3	2	35.168	0.4	1.47517	3	5.5669	20	22.0962	18.6468	0.4	2.406	1.2117	0.1	0.6	0.4	1.5161	0.2	0.2
Li-HS-86_sph_II_290.d	20	15.227	670.231	1.1204	30.748	0.3	2	34.381	0.4	1.32449	3	6.8839	20	21.989	18.2568	0.4	3.241	1.2239	0.1	0.6	0.4	1.5185	0.2	0.2
Li-HS-86_sph_II_291.d	20	17.935	675.138	1.138	33.908	0.3	2	28.59	0.4	1.3565	3	6.9338	20	23.5169	20.3603	0.4	3.0641	1.0869	0.1	0.6	0.4	1.4977	0.2	0.2
Li-HS-86_sph_II_292.d	20	20.935	935.757	1.6516	45.894	0.3	2	29.281	0.4	2.06097	3	8.02	20	29.2479	25.5207	0.4	4.8475	1.357	0.1	0.6	0.4	2.0134	0.2	0.2
Li-HS-86_sph_II_293.d	20	16.338	931.027	1.4874	37.222	0.3	2	31.413	0.4	1.50556	3	8.4484	20	28.8228	25.9199	0.4	3.7516	1.5389	0.1	0.6	0.4	1.7331	0.2	0.2
Li-HS-86_sph_II_294.d	20	10.482	735.681	0.94475	31.76	0.3	2	16.185	0.4	1.30581	3	6.8219	20	24.2511	20.664	0.4	2.3869	1	0.1	0.6	0.4	1.3136	0.2	0.2
Li-HS-86_sph_II_295.d	20	15.907	705.705	1.0624	30.285	0.3	2	14.834	0.4	1.28435	3	7.8847	20	25.7996	22.6029	0.4	2.4063	1	0.1	0.6	0.4	1.5884	0.2	0.2
Li-HS-86_sph_II_296.d	20	13.575	607.441	1.3492	28.614	0.3	2	14.087	0.4	1.197	3	5.1122	20	23.018	16.8257	0.4	2.2595	1.0782	0.1	0.6	0.4	1.359	0.2	0.2
Li-HS-86_sph_II_297.d	20	11.816	861.083	1.0533	42.537	0.3	2	8.7778	0.4	1.75032	3	6.913	20	26.5877	23.2125	0.4	3.0048	1	0.1	0.6	0.4	1.1944	0.2	0.2
Li-HS-86_sph_II_298.d	20	14.31	780.852	1.0956	34.33	0.3	2	9.9565	0.4	1.27101	3	6.4379	20	22.104	20.6073	0.4	2.3908	1.1731	0.1	0.6	0.4	1.241	0.2	0.2
Li-HS-86_sph_II_299.d	20	18.298	1081.62	1.6495	49.132	0.3	2	13.032	0.4	2.09032	3	532.38	20	31.9518	34.0649	0.4	3.0726	1.3754	0.1	0.6	0.4069	2.4162	0.2	0.2
Li-HS-86_sph_II_300.d	20	19.396	759.567	1.5529	37.48	0.3	2	9.625	0.4	1.55498	3	8.2017	20	28.1192	24.8905	0.4	2.4903	1	0.1	0.6	0.4	1.7416	0.2	0.2
Li-HS-86_sph_II_301.d	20	9.8229	692.047	1.2577	35.243	0.3	2	6.6401	0.4	1.38017	3	6.2395	20	21.8336	22.6735	0.4	2.5824	1	0.1	0.6	0.4	1.5961	0.2	0.2
Li-HS-86_sph_II_302.d	20	12.356	859.428	1.15	31.901	0.3	2	4.926	0.4	1.25384	3	5.7279	20	23.2299	21.9113	0.4	1.6577	1.0237	0.1	0.6	0.4	1.3812	0.2	0.2
Li-HS-86_sph_II_303.d	20	14.273	809.527	0.84043	28.86	0.3	2	4.8966	0.4	1.28076	3	6.8368	20	25.4593	18.8483	0.4	1.8749	1	0.1	0.6	0.4	1.3306	0.2	0.2
Li-HS-86_sph_II_312.d	20	15.36	723.088	1.4504	22.812	0.3	2	3.4243	0.4	1.63409	3	6.1752	20	28.4279	25.2312	0.4	2.5025	1	0.1	0.6	0.4	2.5495	0.2	0.2
Li-HS-86_sph_II_313.d	20	12.018	774.644	1.3407	26.746	0.3	2	2.8639	0.4	1.13632	3	7.3285	20	22.1505	18.6475	0.4	1.3964	1	0.1	0.6	0.4	1.5612	0.2	0.2
Li-HS-86_sph_II_314.d	20	13.22	838.439	1.3624	27.006	0.3	2	2.9262	0.4	1.32553	3	6.1401	20	29.4105	23.5847	0.4	1.7383	1	0.1	0.6	0.4	1.8478	0.2	0.2
Li-HS-86_sph_II_315.d	20	13.753	979.154	1.7106	27.056	0.3	2	3.2568	0.4	1.30778	3	6.5932	20	32.8187	29.3572	0.4	1.6901	1	0.1	0.6	0.4	2.2228	0.2	0.2
Li-HS-86_sph_II_316.d	20	11.177	881.067	1.1674	23.708	0.3	2	3.0026	0.4	1.16893	3	7.8484	20	25.4707	19.7024	0.4	1.1792	1	0.1	0.6	0.4	1.7359	0.2	0.2
Li-HS-86_sph_II_317.d	20	12.976	727.877	1.272	24.949	0.3	2	2.7209	0.4	1.12753	3	6.5158	20	21.3517	18.3909	0.4	1.3253	1	0.1	0.6	0.4	1.5571	0.2	0.2
Li-HS-86_sph_II_318.d	20	12.945	830.989	1.1594	23.827	0.3	2	2.8346	0.4	1.11669	3	6.094	20	23.7011	22.0373	0.4	1.6933	1	0.1	0.6	0.4	1.8163	0.2	0.2
Li-HS-86_sph_II_319.d	20	13.536	758.739	1.2207	21.035	0.3	2	2.4467	0.4	1.26626	3	7.0484	20	27.6497	20.6073	0.4	1.2016	1	0.1	0.6	0.4	1.8915	0.2	0.2
Li-HS-86_sph_II_320.d	20	12.844	661.421	1.3408	23.123	0.3	2	2.4487	0.4	1.09005	3	7.0566	20	27.7668	22.2136	0.4	1.804	1	0.1	0.6	0.4	1.954	0.2	0.2
Li-HS-86_sph_II_321.d	20	11.661	621.808	1.1003	19.119	0.3	2	2.5001	0.4	1.1576	3	7.0475	20	22.3392	21.2247	0.4	1.3248	1	0.1	0.6	0.4	1.6141	0.2	0.2
Li-HS-86_sph_II_322.d	20	9.8541	698.965	1.1338	19.554	0.3	2	2.4828	0.4	0.970015	3	5.8235	20	22.1285	17.2615	0.4	1.5475	1	0.1	0.6	0.4	1.5764	0.2	0.2
Li-HS-86_sph_II_323.d	20	11.719	888.044	1.0576	21.108	0.3	2	1.9877	0.4	0.940772	3	6.2676	20	27.6654	21.0423	0.4	1.7322	1	0.1	0.6	0.4	1.0932	0.2	0.2
Li-HS-86_sph_II_324.d	20	11.585	632.923	1.0823	20.768	0.3	2	2.1934	0.4	1.01211	3	5.5704	20	21.7598	17.6923	0.4	1.5526	1	0.1	0.6	0.4	1.5921	0.2	0.2
Li-HS-86_sph_II_325.d	20	13.944	708.839	1.3926	20.677	0.3	2	2.2169	0.4	1.52006	3	7.217	20	32.7051	22.533	0.4	1.9477	1	0.1	0.6	0.4	1.7639	0.2	0.2
Li-HS-86_sph_II_326.d	20	9.6143	787.296	0.95382	19.502	0.3	2	2.2638	0.4	1.22252	3	5.3755	20	25.9788	18.8806	0.4	1.857	1	0.1	0.6	0.4	1.5106	0.2	0.2
Li-HS-86_sph_II_327.d	20	8.602	840.449	1.3345	21.839	0.3	2	2.638	0.4	1.22983	3	5.9059	20	24.4924	19.1201	0.4	1.706	1	0.1	0.6	0.4	1.6734	0.2	0.2
Li-HS-86_sph_II_328.d	20	11.473	708.543	1.161	22.677	0.3	2	2.2332	0.4	1.17856	3	6.3954	20	25.2152	22.7462	0.4	1.4133	1	0.1	0.6	0.4	1.6555	0.2	0.2
Li-HS-86_sph_II_329.d	20	12.84	727.818	1.1214	22.836	0.3	2	2.0493	0.4	1.1622	3	5.7504	20	23.27	20.5775	0.4	1.2246	1	0.1	0.6	0.4	1.4363	0.2	0.2
Li-HS-86_sph_II_330.d	20	9.5715	685.544	0.96926	23.777	0.3	2	2.5013	0.4	1.01537	3	4.8083	20	24.1858	17.8778	0.4	1.5134	1	0.1	0.6	0.4	1.164	0.2	0.2
Li-HS-86_sph_II_331.d	20	18.505	846.598	1.4411	23.894	0.3	2	3.1857	0.4	1.25176	3	7.4101	20	33.0688	22.1171	0.4	2.0019	1	0.1	0.6	0.4	1.6681	0.2	0.2
Li-HS-86_sph_II_332.d	20	8.6613	740.588	1.2165	19.395	0.3	2	2.3732	0.4	1.08627	3	5.877	20	23.3008	21.516	0.4	1.1446	1	0.1	0.6	0.4	1.2684	0.2	0.2
Standard measurements
Source file		Na_ppm_m23_LOD	Cl_ppm_m35_LOD	Mn_ppm_m55_LOD	Fe_ppm_m57_LOD	Co_ppm_m59_LOD	Ni_ppm_m60_LOD	Cu_ppm_m63_LOD	Ga_ppm_m69_LOD	Ge_ppm_m72_LOD	Ge_ppm_m73_LOD	As_ppm_m75_LOD	Se_ppm_m77_LOD	Br_ppm_m79_LOD	Br_ppm_m81_LOD	Ag_ppm_m107_LOD	Cd_ppm_m111_LOD	In_ppm_m113_LOD	In_ppm_m115_LOD	Sn_ppm_m118_LOD	Sb_ppm_m121_LOD	Hg_ppm_m202_LOD	Tl_ppm_m205_LOD	Pb_ppm_m208_LOD
NIST610_239.d		0.95683	23.3511	0.085605	2.0461	0.0053109	0.028673	0.7857	0.0066225	0.0917746	0.054723	0.54048	0	1.52701	1.44143	0.016546	0.11655	0.041743	0.002061	0.018595	0.015023	0.11499	0.011978	0.021748
NIST610_240.d		9.2179	26.1305	0.069868	150.88	0.010802	0.056736	0.22268	0.0057674	0.102317	0.104928	0.5051	0.23431	1.60898	1.29349	0.017932	0.10617	0.034102	0.0014405	0.02427	0.018207	0.10907	0.015701	0.093622
NIST610_268.d		0.72362	25.408	0.073031	1.6221	0.0034516	0.012592	0.19972	0.0045512	0.074298	0.0450741	0.38122	0.104	1.60135	1.15145	0.011149	0.068078	0.03071	0.0015568	0.02057	0.012549	0.094258	0.0049097	0.0055382
NIST610_269.d		0.76878	19.3779	0.067962	1.3819	0.0076154	0.012595	0.16241	0.0025078	0.0721474	0.0968577	0.33787	0.16481	1.53276	1.37564	0.014709	0.088004	0.030472	0.0035033	0.017437	0.019677	0.095263	0.0067531	0.0087276
NIST610_304.d		0.85256	19.5056	0.069059	1.6508	0.004845	0.011454	0.31344	0.0044533	0.0878688	0.0647802	0.44187	0.11721	1.63087	1.53546	0.012637	0.1105	0.051951	0.0018252	0.018349	0.01584	0.09949	0.0052652	0.0074315
NIST610_305.d		0.74669	22.8837	0.076699	1.9342	0.0041939	0.0083032	0.19701	0.0048448	0.0912595	0.0908315	0.37835	0.11783	1.5125	1.34072	0.013614	0.10428	0.032569	0.0017674	0.021849	0.020777	0.10535	0.0065023	0.0074821
NIST610_333.d		0.71761	22.3081	0.070257	1.2075	0.0041015	0.027692	0.16311	0.00506	0.0716636	0.0612213	0.38158	0.099835	2.00704	1.00654	0.015038	0.10006	0.038144	0.0014617	0.018316	0.0099791	0.093793	0.0040292	0.0054992
NIST610_334.d		0.71375	24.0159	0.070441	1.2393	0.005682	0.0072135	0.15299	0.0037435	0.0892759	0.0899661	0.33663	0	1.56104	1.48972	0.014149	0.081848	0.037032	0.0018527	0.019842	0.021727	0.080546	0.0064784	0.0062614
MASS1_241.d		0	0	0	0	0	0	0	0	0	0	0	0	0	0	0	0	0	0	0	0	0	0	0
MASS1_242.d		0	0	0	0	0	0	0	0	0	0	0	0	0	0	0	0	0	0	0	0	0	0	0
MASS1_243.d		0	0	0	0	0	0	0	0	0	0	0	0	0	0	0	0	0	0	0	0	0	0	0
MASS1_270.d		0	0	0	0	0	0	0	0	0	0	0	0	0	0	0	0	0	0	0	0	0	0	0
MASS1_271.d		0	0	0	0	0	0	0	0	0	0	0	0	0	0	0	0	0	0	0	0	0	0	0
MASS1_272.d		0	0	0	0	0	0	0	0	0	0	0	0	0	0	0	0	0	0	0	0	0	0	0
MASS1_306.d		0	0	0	0	0	0	0	0	0	0	0	0	0	0	0	0	0	0	0	0	0	0	0
MASS1_307.d		0	0	0	0	0	0	0	0	0	0	0	0	0	0	0	0	0	0	0	0	0	0	0
MASS1_308.d		0	0	0	0	0	0	0	0	0	0	0	0	0	0	0	0	0	0	0	0	0	0	0
MASS1_335.d		0	0	0	0	0	0	0	0	0	0	0	0	0	0	0	0	0	0	0	0	0	0	0
MASS1_336.d		0	0	0	0	0	0	0	0	0	0	0	0	0	0	0	0	0	0	0	0	0	0	0
MASS1_337.d		0	0	0	0	0	0	0	0	0	0	0	0	0	0	0	0	0	0	0	0	0	0	0
Blank measurements (synthetic sphalerite, >99.995%)
Source file		Na_ppm_m23_LOD	Cl_ppm_m35_LOD	Mn_ppm_m55_LOD	Fe_ppm_m57_LOD	Co_ppm_m59_LOD	Ni_ppm_m60_LOD	Cu_ppm_m63_LOD	Ga_ppm_m69_LOD	Ge_ppm_m72_LOD	Ge_ppm_m73_LOD	As_ppm_m75_LOD	Se_ppm_m77_LOD	Br_ppm_m79_LOD	Br_ppm_m81_LOD	Ag_ppm_m107_LOD	Cd_ppm_m111_LOD	In_ppm_m113_LOD	In_ppm_m115_LOD	Sn_ppm_m118_LOD	Sb_ppm_m121_LOD	Hg_ppm_m202_LOD	Tl_ppm_m205_LOD	Pb_ppm_m208_LOD
Pure_Sph_273.d		0.70786	19.1346	0.057646	1.3875	0.02	0.1	0.33906	0.03	0.070648	0.2	0.37274	1	1.63339	1.36304	0.03	0.2	0.08	0.008	0.03	0.03	0.13176	0.01	0.31674
Pure_Sph_274.d		0.72452	20.6133	0.065167	1.5465	0.02	0.1	0.37955	0.03	0.076518	0.2	0.35468	1	1.41957	1.10291	0.03	0.2	0.08	0.008	0.03	0.03	0.14412	0.01	0.01
Pure_Sph_275.d		0.73417	21.7665	0.077281	1.4558	0.02	0.1	0.42842	0.03	0.060379	0.2	0.34209	1	1.35981	1.17689	0.03	0.2	0.08	0.008	0.03	0.03	0.14378	0.01	0.01
Pure_Sph_309.d		0.57035	22.9103	0.065304	1.2591	0.02	0.1	0.283	0.03	0.062723	0.2	0.3922	1	1.80428	1.50523	0.03	0.2	0.08	0.008	0.03	0.03	0.12635	0.01	0.01
Pure_Sph_310.d		0.81556	25.3072	0.072464	1.5442	0.02	0.1	0.22792	0.03	0.068631	0.2	0.41701	1	1.24215	1.05973	0.03	0.2	0.08	0.008	0.03	0.03	0.12489	0.01	0.01
Pure_Sph_311.d		0.75259	20.6467	0.050996	1.6156	0.02	0.1	0.19738	0.03	0.06	0.2	0.35796	1	1.37621	1.3502	0.03	0.2	0.08	0.008	0.03	0.03	0.12452	0.01	0.01
Pure_Sph_338.d		0.79347	17.8253	0.063842	1.1963	0.02	0.1	0.18594	0.03	0.06	0.2	0.2746	1	1.1457	1.46286	0.03	0.2	0.08	0.008	0.03	0.03	0.12791	0.01	0.01
Pure_Sph_339.d		0.68863	16.7164	0.055798	1.0535	0.02	0.1	0.16534	0.03	0.06	0.2	0.3161	1	1.53698	1.23204	0.03	0.2	0.08	0.008	0.03	0.03	0.1088	0.01	0.01
Pure_Sph_340.d		0.6895	20.6098	0.062401	1.2053	0.02	0.1	0.18892	0.03	0.062128	0.2	0.30194	1	1.38714	1.30247	0.03	0.2	0.08	0.008	0.03	0.03	0.13825	0.01	0.01

## Sheet: Concentrations2
Sample Data
Source file	Spot size (µm)	Na_ppm_m23	Cl_ppm_m35 (corrected)	Mn_ppm_m55	Fe_ppm_m57	Co_ppm_m59	Ni_ppm_m60	Cu_ppm_m63	Ga_ppm_m69	Ge_ppm (best value)	As_ppm_m75	Se_ppm_m77	Br_ppm_m79	Br_ppm_m81	Ag_ppm_m107	Cd_ppm_m111	In_ppm (best value)	Sn_ppm_m118	Sb_ppm_m121	Hg_ppm_m202	Tl_ppm_m205	Pb_ppm_m208	PC1	T (GGIMFis)
Li-HS-86_sph_II - 1.d	50	28.2	1144.05	44.8	3481	0.233	-0.019707	720	0.019	176.32	365	-2	6.20968	4.43548	100	882.4	-0.02	-0.08	1.811	9.17	16.14	2850
Li-HS-86_sph_II - 2.d	50	1.61	360.657	3	3449	1.639	-0.025687	573	-0.06	159.79	262	-2	3.19355	1.91613	40.2	1161	-0.02	-0.08	4.37	10.79	4.11	370.7	1.10176	148.064
Li-HS-86_sph_II - 4.d	50	20.1	2196.46	88.4	3509	0.273	-0.02592	1021	0.0382	144.594	542	-2	14.1581	9.65161	129.4	880.8	-0.02	-0.08	11.9	9.29	20.28	2021	0.297414	191.821
Li-HS-86_sph_II - 5.d	50	15.73	1667.3	3.2	3658	0.297	-0.005786	1050	0.0131	129.63	625	-0.3	9.58065	7.80645	119.5	834.2	-0.002	0.023	9.84	3.088	28.6	1393	0.939573	156.887
Li-HS-86_sph_II - 6.d	110	348.6	6409.05	153.8	6425	1.368	42.6	1698	0.0177	266.568	841	-0.3	24.8387	20.5452	138.6	973.2	-0.002	0.0199	1.764	3.21	829	7010	0.181477	198.128
Li-HS-86_sph_II - 7.d	110	863	3538.58	20.85	5783	0.234	3.63	813	0.1615	101.86	364	-0.3	18.0258	15.3645	106.21	961.1	-0.002	0.0216	7.24	3.171	38.7	632.7	0.894847	159.32
Li-HS-86_sph_II - 8.d	110	353.1	3780.99	76.58	6977	4.63	13.69	4529	0.051	213.266	4248	-0.3	16.7839	14.371	364.7	990.4	-0.002	0.0202	3.387	3.527	536.5	10840	0.474181	182.205
Li-HS-86_sph_II - 9.d	110	174.1	6021.79	17.79	5969	0.1489	0.0177	6373	0.0056	245.514	3774	-0.3	25.7613	20.7935	359.2	962.9	-0.002	0.0179	0.452	3.261	1400	6939	0.368842	187.935
Li-HS-86_sph_II - 10.d	110	279	6125.26	13.85	5730	0.1823	0.0258	7023	0.0067	341.968	3984	-0.3	25.0516	21.5387	400	962.6	-0.002	0.0194	0.453	3.745	1134	6129	0.546387	178.277
Li-HS-86_sph_II - 11.d	110	322.5	7830.99	16.58	5307	0.18	0.0131	2187	0.0095	235.712	1053	-0.3	29.4161	24.5797	126.16	966.2	-0.002	0.0185	0.608	3.595	1318	6961	0.533736	178.965
Li-HS-86_sph_II - 12.d	110	498.2	7689.09	400.8	4905	0.2277	0.0176	1534	0.028	197.009	674	-0.3	28.5645	24.0226	105.02	1045.1	-0.002	0.0195	2.333	3.665	1040.3	5696	0.12417	201.245
Li-HS-86_sph_II - 13.d	110	378.1	7556.06	14.71	4138	0.2925	0.0072	1577	0.0182	186.319	723	-0.3	27.9968	23.3484	102.49	960.9	-0.002	0.0211	0.538	3.359	723	6854	0.741027	167.688
Li-HS-86_sph_II - 14.d	110	214.5	5808.94	12.72	5540	0.121	0.031	5457	0.015	275.558	3471	-0.3	24.4839	20.6871	325.7	941.2	-0.002	0.0182	0.814	3.593	932	5943	0.705691	169.61
Li-HS-86_sph_II - 15.d	110	342.1	4883.65	33.13	6709	0.758	9.24	3972	0.1817	180.206	1718	-0.3	22.2839	18.2742	184.3	947.8	-0.002	0.0168	5.17	3.776	498	3580	0.898714	159.11
Li-HS-86_sph_II - 16.d	50	304	5448.28	42	5215	0.113	0.43	2890	0.065	171.854	2330	-2	27.9613	21.3613	233	942.7	-0.02	-0.08	2.844	9.06	715.4	4676	0.454597	183.27
Li-HS-86_sph_II - 17.d	50	297.4	7990.62	15.58	4837	0.179	0.028	2290	-0.06	253.344	1296	-2	34.5613	27.8194	138.4	962.3	-0.02	-0.08	0.602	9.57	1382	7437	0.748547	167.279
Standard measurements
Source file	Spot size (µm)	Na_ppm_m23	Cl_ppm_m35	Mn_ppm_m55	Fe_ppm_m57	Co_ppm_m59	Ni_ppm_m60	Cu_ppm_m63	Ga_ppm_m69	Ge_ppm (best value)	As_ppm_m75	Se_ppm_m77	Br_ppm_m79	Br_ppm_m81	Ag_ppm_m107	Cd_ppm_m111	In_ppm (best value)	Sn_ppm_m118	Sb_ppm_m121	Hg_ppm_m202	Tl_ppm_m205	Pb_ppm_m208
NIST610 - 17.d	70	78830	820.051	473.7	497.6	362.7	451.7	452.1	479.9	426.416	339.8	125.3	31.4742	31.1194	217.1	317.2	382.238	442.6	391.1	-0.3037	50.74	436.1
NIST610 - 18.d	70	77550	764.474	470.9	491.9	356.9	444.6	449.1	477.7	422.356	334.5	123.7	31.1548	31.0484	216	315.1	380.449	440.3	387.6	-0.29801	53.03	436.9
NIST610 - 19.d	70	78920	747.624	478.4	499.9	363.2	448.1	457.9	482.2	429.432	336.3	124.7	30.5161	30.4097	219.4	311.4	385.836	443.7	392.1	-0.27974	54.93	443.3
MASS1 - 49.d	70	24590	2979.85	282.2	158300	60.89	98.8	141500	64.6	58.3828	65.26	51.8	-0.759568	0.993548	50.6	61.3	50.717	59.73	60.3	56.3	61.1	68.8
MASS1 - 50.d	70	25830	3086.28	286.1	157000	61.2	97.5	136600	66.1	58.8874	65.89	53	0.993548	0.958065	52.9	62.6	49.4295	60.25	61.4	56.7	58.9	69
MASS1 - 51.d	70	25750	3068.54	278.6	154200	61.46	97.9	131900	63.2	57.13	64.1	51.6	1.17097	0.922581	48.2	56.2	49.4166	57.9	59.5	58.8	59.1	66.5
MASS1 - 52.d	70	25330	3059.67	286.1	158500	60.64	94.8	136400	64.8	60.088	66.2	51.1	-0.887984	0.958065	52.2	57.6	50.4114	60.3	61.4	58.5	61.2	69.3
MASS1 - 53.d	70	24180	2876.39	284.1	156600	60.05	95.7	133500	63.9	57.8028	62.8	50.9	0.816129	0.993548	49.9	58.4	50.0194	59.4	59.5	54	57.7	68.7
MASS1 - 54.d	70	25760	2879.34	282.3	163300	60.66	97.9	137300	65.75	59.3166	66.2	51.3	1.24194	0.780645	50.2	56.6	51.7855	60.61	61.25	58.5	60.8	69.4
MASS1 - 55.d	70	24880	3216.35	281.2	157800	60.23	98.8	129100	65.6	59.16	66.9	51.3	1.77419	1.49032	49.2	66.1	50.3868	59.1	60.9	59.4	60.4	69.1
MASS1 - 56.d	70	24790	2962.12	282.4	157400	59.68	96.1	136100	64.3	59.5254	66.7	51	1.34839	-0.610571	51	61.7	51.1149	59.8	60.8	56.33	61.8	68.2
MASS1 - 57.d	70	23310	2997.59	275.5	152600	58.1	93.9	132600	62.4	56.3934	63.4	50.5	-0.845297	1.45484	48.74	67.1	49.4216	58.2	58.49	57.36	59.3	67.3
Blank measurements (synthetic sphalerite, >99.995%)
Source file	Spot size (µm)	Na_ppm_m23	Cl_ppm_m35	Mn_ppm_m55	Fe_ppm_m57	Co_ppm_m59	Ni_ppm_m60	Cu_ppm_m63	Ga_ppm_m69	Ge_ppm (best value)	As_ppm_m75	Se_ppm_m77	Br_ppm_m79	Br_ppm_m81	Ag_ppm_m107	Cd_ppm_m111	In_ppm (best value)	Sn_ppm_m118	Sb_ppm_m121	Hg_ppm_m202	Tl_ppm_m205	Pb_ppm_m208	SUM Metals
PureSph - 33.d	70	1.09	203.978	-0.032511	-0.37299	-0.02	-0.01	0.079	0.0845	-0.3074	0.166	-1	1.13548	1.21	0.339	2.62	0.0985679	0.1061	0.0851	5.13	0.0169	0.2393	9.97547
PureSph - 34.d	70	1.21	197.474	-0.032108	-0.50083	-0.02	-0.01	-0.07	0.092	-0.232	0.105	-1	1.17452	1.07516	0.322	2.471	0.100969	0.1058	0.0522	5.09	0.016	0.2239	9.78887
PureSph - 35.d	70	0.57	175.303	-0.033872	-0.33221	-0.02	-0.01	-0.23	0.0883	-0.28768	0.235	-1	1.20645	1.05742	0.331	4.66	0.098635	0.0864	0.0745	5.52	0.0104	0.1877	11.8619
PureSph - 36.d	70	0.87	178.555	-0.030862	-0.45419	-0.02	-0.01	0.08	0.0859	-0.2378	0.109	-1	1.3129	1.32	0.344	4.38	0.101186	0.0986	0.0442	5.92	0.0114	0.2216	12.1859
PureSph - 37.d	70	0.89	184.172	-0.035606	-0.42248	-0.02	-0.01	0.094	0.1061	-0.31668	0.464	-1	1.20645	0.922581	0.349	5.99	0.115921	0.0957	0.0739	5.57	0.0141	0.2213	13.89
PureSph - 38.d	70	1.67	175.894	-0.03282	-0.40243	-0.02	-0.01	0.111	0.0858	-0.26912	0.473	-1	1.39097	1.05742	0.343	5.51	0.100081	0.1083	0.044	5.74	0.0202	0.2552	14.3496

## Sheet: Uncertainties2 (2SE)
Sample Data
Source file	Spot size (µm)	Na_ppm_m23_Int2SE	Cl_ppm_m35_Int2SE	Mn_ppm_m55_Int2SE	Fe_ppm_m57_Int2SE	Co_ppm_m59_Int2SE	Ni_ppm_m60_Int2SE	Cu_ppm_m63_Int2SE	Ga_ppm_m69_Int2SE	Ge_ppm_m72_Int2SE	Ge_ppm_m73_Int2SE	As_ppm_m75_Int2SE	Se_ppm_m77_Int2SE	Br_ppm_m79_Int2SE	Br_ppm_m81_Int2SE	Ag_ppm_m107_Int2SE	Cd_ppm_m111_Int2SE	In_ppm_m113_Int2SE	In_ppm_m115_Int2SE	Sn_ppm_m118_Int2SE	Sb_ppm_m121_Int2SE	Hg_ppm_m202_Int2SE	Tl_ppm_m205_Int2SE	Pb_ppm_m208_Int2SE
Li-HS-86_sph_II - 1.d	50	3.6	144.854	4.3	22	0.019	0.0091	100	0.0046	15.08	15.08	58	0.1	1.06452	0.851613	17	4.8	1.8	1.3e-08	0.011	0.066	0.79	0.75	340
Li-HS-86_sph_II - 2.d	50	0.42	32.5182	0.16	31	0.035	0.0096	14	0.0026	8.816	9.164	24	0.13	0.958065	0.603226	2.7	17	6.9	1.5e-08	0.009	0.81	0.9	0.19	30
Li-HS-86_sph_II - 4.d	50	1.2	50.2555	2.8	32	0.016	0.011	11	0.0072	1.16	1.624	10	0.15	1.06452	0.780645	1.7	4.2	1.8	0.00027	0.0086	0.38	0.81	0.32	23
Li-HS-86_sph_II - 5.d	50	0.54	44.3431	6.4	16	0.011	0.0027	31	0.0022	1.972	1.972	36	0.052	0.46129	0.390323	4.5	4.2	1.9	1.4e-09	0.0035	0.98	0.052	2.1	31
Li-HS-86_sph_II - 6.d	110	6.2	103.467	2.3	26	0.07	3.7	27	0.0019	3.132	3.132	25	0.036	0.567742	0.496774	1.7	6.5	2.8	1.8e-09	0.0021	0.059	0.07	22	210
Li-HS-86_sph_II - 7.d	110	14	44.3431	0.18	28	0.02	1.1	82	0.0052	0.8004	0.8236	39	0.037	0.532258	0.390323	0.87	4	1.8	1.9e-09	0.0028	0.21	0.077	0.21	3.2
Li-HS-86_sph_II - 8.d	110	3.7	32.5182	0.93	69	0.22	0.79	33	0.0028	1.16	1.392	71	0.03	0.425806	0.354839	2.9	4.6	1.6	0.0001	0.0025	0.043	0.07	7.9	440
Li-HS-86_sph_II - 9.d	110	1.3	41.3869	0.28	37	0.0055	0.0046	70	0.0014	1.392	1.624	35	0.04	0.567742	0.532258	2.5	4.9	2.4	0.00014	0.0026	0.014	0.083	10	56
Li-HS-86_sph_II - 10.d	110	15	73.9051	0.18	35	0.0057	0.053	96	0.033	5.104	4.988	54	0.042	0.532258	0.425806	3.9	3.6	1.6	0.00011	0.0023	0.068	0.074	10	55
Li-HS-86_sph_II - 11.d	110	4.8	44.3431	0.2	29	0.0051	0.0045	44	0.0014	2.552	2.784	24	0.039	0.496774	0.326452	0.81	4.2	1.6	1.6e-09	0.0025	0.024	0.077	15	63
Li-HS-86_sph_II - 12.d	110	5.6	47.2993	7.3	30	0.007	0.0049	39	0.0031	0.8932	0.9396	19	0.04	0.46129	0.46129	0.6	4.6	1.6	1.6e-09	0.0022	0.038	0.081	9.1	42
Li-HS-86_sph_II - 13.d	110	3.9	97.5547	0.35	38	0.0071	0.0032	71	0.0023	1.0208	1.0904	29	0.045	0.532258	0.496774	0.94	4.9	2.1	1.3e-09	0.0026	0.019	0.078	22	91
Li-HS-86_sph_II - 14.d	110	2.3	47.2993	0.1	32	0.023	0.21	55	0.0014	1.856	2.088	48	0.043	0.496774	0.425806	3.9	3.8	1.9	0.00011	0.0023	0.019	0.063	15	63
Li-HS-86_sph_II - 15.d	110	5.3	41.3869	0.3	60	0.065	0.83	61	0.0061	2.088	2.088	44	0.033	0.46129	0.425806	2.7	5.3	2.2	1.5e-09	0.0025	0.14	0.086	7.8	28
Li-HS-86_sph_II - 16.d	50	17	186.241	1.2	76	0.079	0.47	200	0.014	4.988	5.22	180	0.13	1.56129	0.958065	17	5.2	2.1	1.6e-08	0.0073	0.077	0.66	9.5	93
Li-HS-86_sph_II - 17.d	50	5.7	73.9051	0.4	66	0.01	0.013	140	0.0023	3.248	3.48	62	0.13	1.24194	1.1	2.5	5.1	1.8	1.6e-08	0.0075	0.039	0.72	17	56
Standard measurements
Source file	Spot size (µm)	Na_ppm_m23_Int2SE	Cl_ppm_m35_Int2SE	Mn_ppm_m55_Int2SE	Fe_ppm_m57_Int2SE	Co_ppm_m59_Int2SE	Ni_ppm_m60_Int2SE	Cu_ppm_m63_Int2SE	Ga_ppm_m69_Int2SE	Ge_ppm_m72_Int2SE	Ge_ppm_m73_Int2SE	As_ppm_m75_Int2SE	Se_ppm_m77_Int2SE	Br_ppm_m79_Int2SE	Br_ppm_m81_Int2SE	Ag_ppm_m107_Int2SE	Cd_ppm_m111_Int2SE	In_ppm_m113_Int2SE	In_ppm_m115_Int2SE	Sn_ppm_m118_Int2SE	Sb_ppm_m121_Int2SE	Hg_ppm_m202_Int2SE	Tl_ppm_m205_Int2SE	Pb_ppm_m208_Int2SE
NIST610 - 17.d	70	690	24.2409	4.6	7.8	3.2	4.2	3.7	3.3	4.06	4.408	2.8	2.2	1.13548	0.993548	1.9	3.4	2.4	3.2	3.4	3.4	0.068	0.41	3.5
NIST610 - 18.d	70	890	23.0584	5.6	7	4.1	4.9	4.9	4.7	4.988	4.872	3.9	2.9	1.06452	1.1	2.4	3.9	3.1	4.3	4.8	4.4	0.067	0.55	4.7
NIST610 - 19.d	70	700	20.9891	4.4	7.6	3.2	4.1	4.2	4	4.176	4.872	3.8	2.6	1.34839	1.1	2.4	3	2.7	4	4.2	4.1	0.073	0.51	4.3
MASS1 - 49.d	70	460	65.0365	3.5	2400	0.58	1.1	2900	1.1	0.7424	0.9164	0.95	1.4	0.390323	0.46129	1.1	2.5	1.4	0.91	0.9	1	0.74	1.2	1.1
MASS1 - 50.d	70	750	59.1241	4.2	2600	0.69	1.2	2000	1.1	0.8584	0.928	0.98	1.2	0.745161	0.425806	1	3	1.3	0.84	0.84	1	1.1	1.1	1.3
MASS1 - 51.d	70	890	73.9051	3.2	3800	0.73	1.1	3100	1.2	1.16	1.276	1.4	1.6	0.496774	0.46129	1.2	3.1	1.8	1.2	1.2	1.3	1.2	1.5	1.6
MASS1 - 52.d	70	760	65.0365	3.9	3100	0.7	1.1	2900	1.1	0.986	1.102	1.3	1.4	0.674194	0.425806	1.2	2.1	1.2	1.2	1.1	1.1	1.1	1.3	1.4
MASS1 - 53.d	70	630	62.0803	4.1	2900	0.57	1.1	3000	1.1	0.928	0.9048	0.97	1.2	0.496774	0.425806	1.2	2	1.2	1	1.1	1.1	1.1	1	1.4
MASS1 - 54.d	70	630	53.2117	3.8	2500	0.57	1.2	2700	0.91	0.8584	0.7888	1	1.5	0.496774	0.390323	1	1.8	1.1	0.9	0.98	0.89	1.1	1	1.1
MASS1 - 55.d	70	590	88.6861	3.3	3200	0.57	1.4	3800	1.3	1.276	1.392	1.4	2	0.603226	0.674194	1.4	2.3	1.3	0.97	1.2	1.3	1.5	1.7	1.6
MASS1 - 56.d	70	620	73.9051	4.2	2600	0.6	1.1	2900	1.1	0.9976	1.0672	1	1.4	0.63871	0.46129	1	2.3	1.3	0.94	1.1	0.98	0.75	1.2	1.4
MASS1 - 57.d	70	500	67.9927	4	3100	0.65	1.1	2900	1	0.928	1.102	1	1.4	0.46129	0.425806	0.95	2.9	1.7	1.1	1	0.99	0.9	1.4	1.6
Blank measurements (synthetic sphalerite, >99.995%)
Source file	Spot size (µm)	Na_ppm_m23_Int2SE	Cl_ppm_m35_Int2SE	Mn_ppm_m55_Int2SE	Fe_ppm_m57_Int2SE	Co_ppm_m59_Int2SE	Ni_ppm_m60_Int2SE	Cu_ppm_m63_Int2SE	Ga_ppm_m69_Int2SE	Ge_ppm_m72_Int2SE	Ge_ppm_m73_Int2SE	As_ppm_m75_Int2SE	Se_ppm_m77_Int2SE	Br_ppm_m79_Int2SE	Br_ppm_m81_Int2SE	Ag_ppm_m107_Int2SE	Cd_ppm_m111_Int2SE	In_ppm_m113_Int2SE	In_ppm_m115_Int2SE	Sn_ppm_m118_Int2SE	Sb_ppm_m121_Int2SE	Hg_ppm_m202_Int2SE	Tl_ppm_m205_Int2SE	Pb_ppm_m208_Int2SE
PureSph - 33.d	70	0.16	7.68613	0.013	0.15	0.00053	0.0055	0.019	0.0058	0.02088	0.02552	0.032	0.099	0.390323	0.259032	0.016	0.1	0.048	0.0035	0.008	0.0095	0.47	0.0018	0.0075
PureSph - 34.d	70	0.19	7.09489	0.012	0.16	0.00055	0.0044	0.016	0.0056	0.01856	0.02552	0.029	0.079	0.305161	0.251935	0.015	0.094	0.045	0.0034	0.0083	0.0096	0.44	0.0017	0.0084
PureSph - 35.d	70	0.16	6.50365	0.011	0.15	0.00034	0.005	0.23	0.0046	0.02088	0.02784	0.043	0.091	0.425806	0.287419	0.018	0.15	0.066	0.0035	0.0073	0.0066	0.51	0.0021	0.0087
PureSph - 36.d	70	0.17	5.91241	0.011	0.18	0.00051	0.0047	0.018	0.0056	0.0174	0.0232	0.046	0.078	0.390323	0.269677	0.012	0.14	0.068	0.0033	0.007	0.0069	0.52	0.0022	0.0099
PureSph - 37.d	70	0.2	6.50365	0.01	0.24	0.00066	0.0042	0.02	0.0055	0.02204	0.02552	0.075	0.083	0.354839	0.262581	0.015	0.18	0.082	0.0036	0.0084	0.0086	0.49	0.0032	0.0078
PureSph - 38.d	70	0.18	6.79927	0.013	0.18	3.3e-07	0.0051	0.02	0.0062	0.0232	0.01972	0.064	0.06	0.333548	0.312258	0.017	0.18	0.077	0.0036	0.0089	0.0069	0.47	0.0032	0.0069

## Sheet: Detection limits2
Sample Data
Source file	Spot size (µm)	Na_ppm_m23_LOD	Cl_ppm_m35_LOD	Mn_ppm_m55_LOD	Fe_ppm_m57_LOD	Co_ppm_m59_LOD	Ni_ppm_m60_LOD	Cu_ppm_m63_LOD	Ga_ppm_m69_LOD	Ge_ppm_m72_LOD	Ge_ppm_m73_LOD	As_ppm_m75_LOD	Se_ppm_m77_LOD	Br_ppm_m79_LOD	Br_ppm_m81_LOD	Ag_ppm_m107_LOD	Cd_ppm_m111_LOD	In_ppm_m113_LOD	In_ppm_m115_LOD	Sn_ppm_m118_LOD	Sb_ppm_m121_LOD	Hg_ppm_m202_LOD	Tl_ppm_m205_LOD	Pb_ppm_m208_LOD
Li-HS-86_sph_II - 1.d	50	1.0111	36.0397	0.074707	1.0348	0.06	0.4	0.1	0.06	0.1	0.7	0.11973	2	1.26766	0.912077	0.1	0.3	0.2	0.02	0.08	0.08	0.13734	0.02	0.02
Li-HS-86_sph_II - 2.d	50	0.96702	38.9084	0.061658	1.1053	0.06	0.4	0.1	0.06	0.1	0.7	0.10545	2	1.08893	1.09886	0.1	0.3	0.2	0.02	0.08	0.08	0.12517	0.02	0.02
Li-HS-86_sph_II - 4.d	50	0.93341	41.394	0.064922	0.71591	0.06	0.4	0.1	0.06	0.1	0.7	0.15215	2	1.69123	1.23118	0.1	0.3	0.2	0.02	0.08	0.08	0.11192	0.02	0.02
Li-HS-86_sph_II - 5.d	50	0.27335	9.80041	0.017489	0.21683	0.06	0.4	0.1	0.06	0.1	0.7	0.050551	2	0.348838	0.313028	0.1	0.3	0.2	0.02	0.08	0.08	0.036827	0.02	0.02
Li-HS-86_sph_II - 6.d	110	0.22795	8.17272	0.014584	0.18059	0.006	0.04	0.02	0.008	0.02	0.07	0.042148	0.3	0.290865	0.261034	0.012906	0.06	0.03	0.002	0.01	0.009	0.030681	0.004	0.004252
Li-HS-86_sph_II - 7.d	110	0.22207	8.4305	0.016791	0.21092	0.006	0.04	0.02	0.008	0.02	0.07	0.037549	0.3	0.242099	0.239019	0.011773	0.06	0.03	0.002	0.01	0.009	0.029544	0.004	0.004
Li-HS-86_sph_II - 8.d	110	0.20484	7.7151	0.016088	0.16814	0.006	0.04	0.02	0.008	0.02	0.07	0.048701	0.3	0.19971	0.254739	0.014223	0.06	0.03	0.002	0.01	0.009	0.028068	0.004	0.004
Li-HS-86_sph_II - 9.d	110	0.22245	6.68339	0.017215	0.20488	0.006	0.04	0.02	0.008	0.02	0.07	0.10997	0.3	0.243292	0.222207	0.011344	0.06	0.03	0.002	0.01	0.009	0.035164	0.004	0.004
Li-HS-86_sph_II - 10.d	110	0.23308	7.26399	0.010895	0.19755	0.006	0.04	0.02	0.008	0.02	0.07	0.046632	0.3	0.302305	0.281969	0.01169	0.06	0.03	0.002	0.01	0.009	0.028361	0.004	0.004
Li-HS-86_sph_II - 11.d	110	0.20954	8.41218	0.012801	0.21962	0.006	0.04	0.02	0.008	0.02	0.07	0.088466	0.3	0.28154	0.216551	0.01	0.06	0.03	0.002	0.01	0.009	0.029094	0.004	0.004
Li-HS-86_sph_II - 12.d	110	0.17526	7.28409	0.016863	0.1872	0.006	0.04	0.02	0.008	0.02	0.07	0.052463	0.3	0.251396	0.234385	0.010492	0.06	0.03	0.002	0.01	0.009	0.028311	0.004	0.004
Li-HS-86_sph_II - 13.d	110	0.23302	7.47624	0.014963	0.1811	0.006	0.04	0.02	0.008	0.02	0.07	0.079584	0.3	0.27242	0.241922	0.011104	0.06	0.03	0.002	0.01	0.009	0.032378	0.0046311	0.004
Li-HS-86_sph_II - 14.d	110	0.22104	8.27205	0.014607	0.16504	0.006	0.04	0.02	0.008	0.02	0.07	0.063035	0.3	0.270706	0.245165	0.011116	0.06	0.03	0.002	0.01	0.009	0.032716	0.004	0.004
Li-HS-86_sph_II - 15.d	110	0.17995	7.06415	0.015023	0.18868	0.006	0.04	0.02	0.008	0.02	0.07	0.091867	0.3	0.316016	0.287135	0.013932	0.06	0.03	0.002	0.01	0.009	0.031032	0.0046977	0.004
Li-HS-86_sph_II - 16.d	50	1.145	28.0875	0.07072	0.82289	0.06	0.4	0.1	0.06	0.1	0.7	0.34201	2	1.37078	1.27345	0.1	0.3	0.2	0.02	0.08	0.08	0.1495	0.02	0.02
Li-HS-86_sph_II - 17.d	50	0.898	40.4769	0.073268	1.1091	0.06	0.4	0.1	0.06	0.1	0.7	0.36434	2	1.11905	1.18594	0.1	0.3	0.2	0.02	0.08	0.08	0.13008	0.02	0.02
Standard measurements
Source file	Spot size (µm)	Na_ppm_m23_LOD	Cl_ppm_m35_LOD	Mn_ppm_m55_LOD	Fe_ppm_m57_LOD	Co_ppm_m59_LOD	Ni_ppm_m60_LOD	Cu_ppm_m63_LOD	Ga_ppm_m69_LOD	Ge_ppm_m72_LOD	Ge_ppm_m73_LOD	As_ppm_m75_LOD	Se_ppm_m77_LOD	Br_ppm_m79_LOD	Br_ppm_m81_LOD	Ag_ppm_m107_LOD	Cd_ppm_m111_LOD	In_ppm_m113_LOD	In_ppm_m115_LOD	Sn_ppm_m118_LOD	Sb_ppm_m121_LOD	Hg_ppm_m202_LOD	Tl_ppm_m205_LOD	Pb_ppm_m208_LOD
NIST610 - 17.d	70	0.98673	20.3467	0.074371	0.93444	0.0017162	0.026382	0.07191	0.0050067	0.061526	0.064077	0.12343	0.36528	1.36854	1.08893	0.064601	0.044069	0.012498	0.00049132	0.013392	0.02053	0.3037	0.0058451	0.0061535
NIST610 - 18.d	70	1.2217	21.9797	0.080471	0.64077	0.0034288	0.012681	0.073023	0.0071596	0.060683	0.07293	0.19685	0.40764	0.97389	1.0851	0.049555	0.065474	0.028018	0	0.013005	0.014814	0.29801	0.011396	0.007427
NIST610 - 19.d	70	1.1874	17.3313	0.063342	0.82297	0.0023407	0.01581	0.063138	0.0048682	0.064266	0.055316	0.19783	0.45275	1.46254	1.19559	0.060572	0.060511	0.030253	0.00067154	0.012641	0.01924	0.27974	0.017161	0.0044291
MASS1 - 49.d	70	0.68482	13.4327	0.051811	0.5367	0.0028726	0.014887	0.070168	0.0033736	0.0348	0.053631	0.078982	0.3007	0.759568	0.935532	0.039851	0.03208	0.0093548	0.00057427	0.011746	0.010566	0.05712	0.0036907	0.0048074
MASS1 - 50.d	70	0.67493	13.4661	0.055049	0.78474	0.0035841	0.016617	0.059603	0.003804	0.038364	0.049792	0.084384	0.34092	0.949477	0.743742	0.043355	0.04075	0.013105	0.00069024	0.013018	0.014485	0.17987	0.0039875	0.0058623
MASS1 - 51.d	70	0.82333	9.77942	0.048532	0.5868	0.0029637	0.015382	0.052093	0.0030374	0.038262	0.056035	0.087222	0.28687	0.940429	0.755984	0.042741	0.028996	0.014539	0	0.0092333	0.011995	0.16868	0.0041341	0.0037344
MASS1 - 52.d	70	0.70311	11.8399	0.044997	0.53781	0.0020531	0.017877	0.081485	0.0033811	0.039195	0.040243	0.1701	0.34179	0.887984	0.839335	0.037043	0.054551	0.017054	0.00034051	0.009031	0.013274	0.06594	0.0081107	0.0078293
MASS1 - 53.d	70	0.73958	12.7211	0.042679	0.47115	0.0018512	0.015592	0.054685	0.0040986	0.03989	0.047833	0.12887	0.24633	0.709855	0.903987	0.029029	0.042374	0.015013	0	0.0076859	0.01139	0.20481	0.0070835	0.0061493
MASS1 - 54.d	70	0.70308	13.0014	0.043128	0.58422	0.0015249	0.014776	0.042053	0.0038466	0.032407	0.033912	0.11652	0.26813	0.841358	0.675294	0.03411	0.052336	0.018895	0	0.0089534	0.011145	0.1954	0.0086711	0.0048003
MASS1 - 55.d	70	0.89212	14.29	0.060322	0.84739	0.0030304	0.017746	0.099251	0.0056686	0.041531	0.049374	0.1804	0.37869	1.22522	0.906968	0.042735	0.067667	0.026412	0.00056615	0.01109	0.011254	0.073014	0.013512	0.011763
MASS1 - 56.d	70	0.58066	14.2613	0.039544	0.68392	0.0013461	0.015008	0.054924	0.004442	0.046474	0.044539	0.15722	0.29185	0.795123	0.610571	0.036845	0.049218	0.016349	0	0.0067982	0.010004	0.14418	0.010451	0.056396
MASS1 - 57.d	70	0.53942	13.8998	0.049522	0.5352	0.0017853	0.010915	0.047113	0.0050365	0.03803	0.034243	0.16902	0.24213	0.845297	0.780681	0.035824	0.052789	0.018999	0.00033146	0.0082689	0.009483	0.20352	0.011141	0.0052359
Blank measurements (synthetic sphalerite, >99.995%)
Source file	Spot size (µm)	Na_ppm_m23_LOD	Cl_ppm_m35_LOD	Mn_ppm_m55_LOD	Fe_ppm_m57_LOD	Co_ppm_m59_LOD	Ni_ppm_m60_LOD	Cu_ppm_m63_LOD	Ga_ppm_m69_LOD	Ge_ppm_m72_LOD	Ge_ppm_m73_LOD	As_ppm_m75_LOD	Se_ppm_m77_LOD	Br_ppm_m79_LOD	Br_ppm_m81_LOD	Ag_ppm_m107_LOD	Cd_ppm_m111_LOD	In_ppm_m113_LOD	In_ppm_m115_LOD	Sn_ppm_m118_LOD	Sb_ppm_m121_LOD	Hg_ppm_m202_LOD	Tl_ppm_m205_LOD	Pb_ppm_m208_LOD
PureSph - 33.d	70	0.4379	9.76346	0.032511	0.37299	0.02	0.1	0.07	0.03	0.07	0.2	0.084505	1	0.644387	0.565152	0.03	0.2	0.08	0.008	0.03	0.03	0.062501	0.01	0.01
PureSph - 34.d	70	0.43836	11.126	0.032108	0.50083	0.02	0.1	0.07	0.03	0.07	0.2	0.061375	1	0.617277	0.507065	0.03	0.2	0.08	0.008	0.03	0.03	0.071321	0.01	0.01
PureSph - 35.d	70	0.33953	9.87106	0.033872	0.33221	0.02	0.1	0.07	0.03	0.07	0.2	0.14539	1	0.652123	0.495106	0.03	0.2	0.08	0.008	0.03	0.03	0.068955	0.01	0.01
PureSph - 36.d	70	0.46652	6.51725	0.030862	0.45419	0.02	0.1	0.07	0.03	0.07	0.2	0.090639	1	0.521968	0.54851	0.03	0.2	0.08	0.008	0.03	0.03	0.070505	0.01	0.01
PureSph - 37.d	70	0.52696	8.85827	0.035606	0.42248	0.02	0.1	0.07	0.03	0.07	0.2	0.12356	1	0.620968	0.5291	0.03	0.2	0.08	0.008	0.03	0.03	0.068905	0.01	0.01
PureSph - 38.d	70	0.46154	9.00667	0.03282	0.40243	0.02	0.1	0.07	0.03	0.07	0.2	0.13437	1	0.515794	0.5093	0.03	0.2	0.08	0.008	0.03	0.03	0.07414	0.01	0.01
